# Supplementary material
Source: PubMed Central journal article supplement (PMC4700664)
Supplement: DS_10.1177_0022034515609554.pdf [file DS_10.1177_0022034515609554.pdf]

# The Microbiome in Populations with a Low and High Prevalence of Caries

Journal of Dental Research  
DSI-DS14  
© International & American Associations  
for Dental Research 2015  
Reprints and permissions:  
sagepub.com/journalsPermissions.nav  
DOI: 10.1177/0022034515609554  
jdr.sagepub.com

I. Johansson<sup>1</sup>, E. Witkowska<sup>1\*</sup>, B. Kaveh<sup>1\*</sup>, P. Lif Holgerson<sup>2</sup>,  
and A.C.R. Tanner<sup>3</sup>

## Appendix

### Pyrosequencing and Sequence Analyses

Sequences with fewer than 300 bp ( $n = 96$ ) and those containing  $\geq 6$  ambiguous bases ( $n = 39$ ), had more than 2 primers or 1 barcode mismatch ( $n = 18,925$ ), had a barcode correction ( $n = 43,845$ ), contained homopolymers exceeding 6 bases ( $n = 81,399$ ), or had an average quality score below 25 ( $n = 3,241$ ) were filtered out. Sequences were trimmed to remove the barcode and forward primer, and sequences extending to the reversed primer were cleaned from the reverse primer and any subsequent sequences. Cleaned sequences were binned into clusters using UCLUST at 98.5% similarity and taxonomically identified by BLAST against the HOMD (Chen et al. 2010) to obtain HOMD Human Oral Taxon (HOT) identification (i.e., named or unnamed species or phylotypes) for each cluster.

Clusters with  $< 20$  sequences were excluded. The original sequence data are available at <http://dx.doi.org/10.6084/m9.figshare.1437451>.

### Overall Sequencing Results

FLX+ Titanium sequencing failed for 1 sample in the Swedish caries-free group, but for the remaining 37 oral samples, a total of 1,267,435 reads were obtained, which after quality filtering was reduced to 1,119,890 reads (88.4%). Of these reads, 942,788 matched at  $\geq 98.5\%$  similarity to HOMD taxa, and 177,102 sequences were filtered out. The mean number of reads that passed quality control by sample was 25,481 (range, 17,138–52,334 reads). The average read length was 720 base pairs.

<sup>1</sup>Section of Cariology, Department of Odontology, Umeå University, Umeå, Sweden

<sup>2</sup>Section of Pedodontics, Department of Odontology, Umeå University, Umeå, Sweden

<sup>3</sup>Department of Microbiology, The Forsyth Institute, Cambridge, MA, USA

\* Authors contributing equally to this article.

#### Corresponding Author:

I. Johansson, Department of Odontology, Umeå University, SE 90187 Umeå, Sweden.  
Email: [ingegerd.johansson@umu.se](mailto:ingegerd.johansson@umu.se)

**Appendix Table 1.** Detected Phyla and Genera.

| Phylum                                                                              | Romania: High Prevalence of Caries |                    |                    | Sweden: Caries Active |                    |                    | Sweden: Caries Free |                    |                    |
|-------------------------------------------------------------------------------------|------------------------------------|--------------------|--------------------|-----------------------|--------------------|--------------------|---------------------|--------------------|--------------------|
|                                                                                     | Phylum (Prevalence)                | Genus (Prevalence) | Genus (Prevalence) | Phylum (Prevalence)   | Genus (Prevalence) | Genus (Prevalence) | Phylum (Prevalence) | Genus (Prevalence) | Genus (Prevalence) |
| <i>Actinobacteria</i> ( $P_{\text{GROUP}} = 0.011, P_{\text{TREND}} = 0.015$ )      | 5.801                              | 0.112              | 1.341              | 26.628                | 19.143             | 0.092              |                     |                    |                    |
| <i>Actinobaculum</i> ( $P_{\text{GROUP}} = 0.002, P_{\text{TREND}} = 0.315$ )       |                                    | <b>4.391</b>       | <b>9.591</b>       |                       |                    | <b>11.136</b>      |                     |                    |                    |
| <i>Actinomyces</i> ( $P_{\text{GROUP}} = 0.003, P_{\text{TREND}} = 0.005$ )         |                                    | 0.023              | 0.012              |                       |                    | 0.037              |                     |                    |                    |
| <i>Atopobium</i>                                                                    |                                    | 0.914              | 3.644              |                       |                    | 4.419              |                     |                    |                    |
| <i>Corynebacterium</i>                                                              |                                    | 0.006              | 0.000              |                       |                    | 0.006              |                     |                    |                    |
| <i>Cryptobacterium</i>                                                              |                                    | 0.000              | 0.000              |                       |                    | 0.000              |                     |                    |                    |
| <i>Olsenella</i>                                                                    |                                    | 0.000              | 0.000              |                       |                    | 0.000              |                     |                    |                    |
| <i>Rothia</i>                                                                       |                                    | 0.354              | 0.256              |                       |                    | 0.045              |                     |                    |                    |
| <i>Bacteroidetes</i>                                                                | 31.533                             |                    |                    | 27.180                | 31.081             |                    |                     |                    |                    |
| <i>Alloprevotella</i>                                                               |                                    | 1.221              | 0.328              |                       |                    | 0.713              |                     |                    |                    |
| <i>Bacteroidales</i> [G-2]                                                          |                                    | 0.027              | 0.246              |                       |                    | 0.088              |                     |                    |                    |
| <i>Bacteroidetes</i> [G-3] ( $P_{\text{GROUP}} = 0.022, P_{\text{TREND}} = 0.007$ ) |                                    | 0.001              | 0.000              |                       |                    | 0.000              |                     |                    |                    |
| <i>Bacteroidetes</i> [G-5]                                                          |                                    | 0.011              | 0.000              |                       |                    | 0.003              |                     |                    |                    |
| <i>Bergeyella</i>                                                                   |                                    | 0.199              | 0.142              |                       |                    | 0.112              |                     |                    |                    |
| <i>Capnocytophaga</i>                                                               |                                    | 4.383              | 3.356              |                       |                    | 4.185              |                     |                    |                    |
| <i>Porphyromonas</i> ( $P_{\text{GROUP}} = 0.008, P_{\text{TREND}} = 0.001$ )       |                                    | <b>3.976</b>       | <b>0.980</b>       |                       |                    | <b>0.450</b>       |                     |                    |                    |
| <i>Prevotella</i>                                                                   |                                    | 16.225             | 14.241             |                       |                    | 20.680             |                     |                    |                    |
| <i>Tannerella</i>                                                                   |                                    | 0.532              | 0.856              |                       |                    | 0.984              |                     |                    |                    |
| <i>Firmicutes</i> ( $P_{\text{GROUP}} = 0.003, P_{\text{TREND}} = 0.015$ )          | 36.493                             |                    |                    | 18.074                | 22.566             |                    |                     |                    |                    |
| <i>Abiotrophia</i> ( $P_{\text{GROUP}} < 0.001, P_{\text{TREND}} = 0.002$ )         |                                    | <b>0.399</b>       | <b>0.004</b>       |                       |                    | <b>0.025</b>       |                     |                    |                    |
| <i>Anaeroglobus</i>                                                                 |                                    | 0.000              | 0.000              |                       |                    | 0.000              |                     |                    |                    |
| <i>Catonella</i>                                                                    |                                    | 0.128              | 0.136              |                       |                    | 0.178              |                     |                    |                    |
| <i>Clostridiales</i> [F-1][G-1]                                                     |                                    | 0.000              | 0.000              |                       |                    | 0.000              |                     |                    |                    |
| <i>Clostridiales</i> [F-2][G-1]                                                     |                                    | 0.144              | 0.087              |                       |                    | 0.067              |                     |                    |                    |
| <i>Clostridiales</i> [F-2][G-2]                                                     |                                    | 0.007              | 0.002              |                       |                    | 0.005              |                     |                    |                    |
| <i>Dialister</i>                                                                    |                                    | 0.126              | 0.204              |                       |                    | 0.287              |                     |                    |                    |
| <i>Eubacterium</i> [11][G-1]                                                        |                                    | 0.006              | 0.007              |                       |                    | 0.000              |                     |                    |                    |
| <i>Eubacterium</i> [11][G-3]                                                        |                                    | 0.002              | 0.092              |                       |                    | 0.057              |                     |                    |                    |
| <i>Eubacterium</i> [11][G-5]                                                        |                                    | 0.000              | 0.000              |                       |                    | 0.000              |                     |                    |                    |
| <i>Eubacterium</i> [11][G-7]                                                        |                                    | 0.055              | 0.043              |                       |                    | 0.062              |                     |                    |                    |
| <i>Filifactor</i> ( $P_{\text{GROUP}} = 0.027, P_{\text{TREND}} = 0.007$ )          |                                    | 0.003              | 0.000              |                       |                    | 0.000              |                     |                    |                    |
| <i>Gemella</i>                                                                      |                                    | 1.044              | 0.529              |                       |                    | 0.574              |                     |                    |                    |
| <i>Granulicatella</i>                                                               |                                    | 0.858              | 0.247              |                       |                    | 0.328              |                     |                    |                    |
| <i>Johnsonella</i>                                                                  |                                    | 0.035              | 0.000              |                       |                    | 0.013              |                     |                    |                    |
| <i>Lachnoanaerobaculum</i>                                                          |                                    | 0.358              | 0.388              |                       |                    | 0.550              |                     |                    |                    |
| <i>Lachnospiraceae</i> [G-2]                                                        |                                    | 0.063              | 0.054              |                       |                    | 0.017              |                     |                    |                    |
| <i>Lachnospiraceae</i> [G-3]                                                        |                                    | 0.020              | 0.040              |                       |                    | 0.010              |                     |                    |                    |
| <i>Lachnospiraceae</i> [G-8]                                                        |                                    | 0.000              | 0.000              |                       |                    | 0.000              |                     |                    |                    |
| <i>Lactobacillus</i>                                                                |                                    | 0.000              | 0.000              |                       |                    | 0.000              |                     |                    |                    |
| <i>Mitsuokella</i>                                                                  |                                    | 0.000              | 0.000              |                       |                    | 0.000              |                     |                    |                    |
| <i>Mogibacterium</i>                                                                |                                    | 0.032              | 0.017              |                       |                    | 0.008              |                     |                    |                    |
| <i>Oribacterium</i>                                                                 |                                    | 0.000              | 0.000              |                       |                    | 0.000              |                     |                    |                    |

(continued)

Appendix Table 1. (continued)

| Phylum         | Genus                                                                                              | Romania: High Prevalence of Caries |                    | Sweden: Caries Active |                    | Sweden: Caries Free |                    |
|----------------|----------------------------------------------------------------------------------------------------|------------------------------------|--------------------|-----------------------|--------------------|---------------------|--------------------|
|                |                                                                                                    | Phylum (Prevalence)                | Genus (Prevalence) | Phylum (Prevalence)   | Genus (Prevalence) | Phylum (Prevalence) | Genus (Prevalence) |
|                | <i>Parvimonas</i>                                                                                  |                                    | 0.096              |                       | 0.145              |                     | 0.052              |
|                | <i>Peptococcus</i>                                                                                 |                                    | 0.045              |                       | 0.028              |                     | 0.022              |
|                | <i>Peptostreptococcaceae</i> [11][G-2]                                                             |                                    | 0.000              |                       | 0.000              |                     | 0.000              |
|                | <i>Peptostreptococcaceae</i> [11][G-4] ( $P_{\text{GROUP}} = 0.020$ , $P_{\text{TREND}} = 0.007$ ) |                                    | 0.000              |                       | 0.000              |                     | 0.000              |
|                | <i>Peptostreptococcaceae</i> [11][G-7] ( $P_{\text{GROUP}} = 0.007$ , $P_{\text{TREND}} = 0.011$ ) |                                    | 0.009              |                       | 0.000              |                     | 0.000              |
|                | <i>Peptostreptococcaceae</i> [13][G-2]                                                             |                                    | 0.000              |                       | 0.000              |                     | 0.000              |
|                | <i>Peptostreptococcus</i>                                                                          |                                    | 0.038              |                       | 0.002              |                     | 0.005              |
|                | <i>Pseudoramibacter</i> ( $P_{\text{GROUP}} = 0.003$ , $P_{\text{TREND}} = 0.003$ )                |                                    | 0.000              |                       | 0.000              |                     | 0.000              |
|                | <i>Selenomonas</i> ( $P_{\text{GROUP}} < 0.001$ , $P_{\text{TREND}} < 0.001$ )                     |                                    | 0.010              |                       | 0.059              |                     | 0.075              |
|                | <i>Shuttleworthia</i>                                                                              |                                    | 0.001              |                       | 0.000              |                     | 0.000              |
|                | <i>Streptococcus</i> ( $P_{\text{GROUP}} = 0.008$ , $P_{\text{TREND}} = 0.027$ )                   |                                    | 30.596             |                       | 13.102             |                     | 17.586             |
|                | <i>Veillonella</i> ( $P_{\text{GROUP}} = 0.015$ , $P_{\text{TREND}} = 0.005$ )                     |                                    | 0.067              |                       | 0.157              |                     | 0.206              |
| Fusobacteria   |                                                                                                    | 18.088                             |                    | 19.839                |                    | 20.299              |                    |
|                | <i>Fusobacterium</i>                                                                               |                                    | 2.803              |                       | 5.801              |                     | 4.767              |
|                | <i>Leptotrichia</i>                                                                                |                                    | 11.991             |                       | 12.451             |                     | 11.014             |
| Proteobacteria |                                                                                                    | 4.152                              |                    | 2.268                 |                    | 2.275               |                    |
|                | <i>Campylobacter</i> ( $P_{\text{GROUP}} = 0.002$ , $P_{\text{TREND}} = 0.001$ )                   |                                    | 0.629              |                       | 1.691              |                     | 1.721              |
|                | <i>Desulfohalobus</i>                                                                              |                                    | 0.000              |                       | 0.000              |                     | 0.000              |
|                | <i>Eikenella</i>                                                                                   |                                    | 0.034              |                       | 0.071              |                     | 0.089              |
|                | <i>Kingella</i>                                                                                    |                                    | 0.155              |                       | 0.178              |                     | 0.138              |
|                | <i>Lautropia</i>                                                                                   |                                    | 0.294              |                       | 0.114              |                     | 0.029              |
|                | <i>Neisseria</i> ( $P_{\text{GROUP}} = 0.008$ , $P_{\text{TREND}} = 0.004$ )                       |                                    | 2.866              |                       | 0.142              |                     | 0.245              |
|                | <i>Ottowia</i>                                                                                     |                                    | 0.000              |                       | 0.000              |                     | 0.000              |
|                | <i>Treponema</i>                                                                                   |                                    | 0.198              |                       | 0.502              |                     | 0.438              |
| SPIROCHAETES   |                                                                                                    | 0.000                              |                    | 0.000                 |                    | 0.004               |                    |
| SR1            |                                                                                                    | 0.000                              |                    | 0.000                 |                    | 0.004               |                    |
| Tenericutes    |                                                                                                    | 0.000                              |                    | 0.000                 |                    | 0.004               |                    |
| TM7            |                                                                                                    | 0.038                              |                    | 0.021                 |                    | 0.070               |                    |
|                | TM7 [G-1] ( $P_{\text{GROUP}} = 0.013$ , $P_{\text{TREND}} = 0.005$ )                              |                                    | 0.000              |                       | 0.000              |                     | 0.000              |
|                | TM7 [G-2]                                                                                          |                                    | 0.007              |                       | 0.000              |                     | 0.000              |
|                | TM7 [G-5]                                                                                          |                                    | 0.007              |                       | 0.000              |                     | 0.000              |

Median prevalence (% of all sequences) in tooth biofilm samples from 37 adolescents according to caries strata (Romanian group with high prevalence of caries prevalence and Swedish caries-active and caries-free groups). Numbers in parenthesis refer to  $P$  values among groups (Kruskal-Wallis test) and for trend by increasing caries presence (Jonckheere test).  $P \leq 0.008$  is considered statistically significant. Values in red indicate data in which both group and trend  $P$  values are  $\leq 0.008$ .

Appendix Table 2. Detected Species/Phylotypes in Romanian and Swedish Adolescents.

| Species/HOMD Taxon                 | Mean Species Prevalence, %         |                       |                     |                    | Proportion in Which Species Was Detected, % |                      |                       |                     | Median Species Prevalence among Positive Subjects, % |         |                      |                       |                     |
|------------------------------------|------------------------------------|-----------------------|---------------------|--------------------|---------------------------------------------|----------------------|-----------------------|---------------------|------------------------------------------------------|---------|----------------------|-----------------------|---------------------|
|                                    | Romania: High Prevalence of Caries |                       | Sweden: Caries Free |                    | Romania: High Prevalence of Caries          |                      | Sweden: Caries Free   |                     | Romania: High Prevalence of Caries                   |         | Sweden: Caries Free  |                       |                     |
|                                    | Prevalence of Caries               | Sweden: Caries Active | Sweden: Caries Free | P <sub>GROUP</sub> | P <sub>TREND</sub>                          | Prevalence of Caries | Sweden: Caries Active | Sweden: Caries Free | $\chi^2$                                             | P Value | Prevalence of Caries | Sweden: Caries Active | Sweden: Caries Free |
| <i>Actinobaculum</i> sp. HOT183    | 0.440                              | 2.639                 | 1.616               |                    |                                             | 85.7                 | 100.0                 | 90.9                |                                                      |         | 0.3765               | 1.1236                | 0.3825              |
| <i>Actinomyces cardiffensis</i>    | 0.134                              | 0.064                 | 0.000               |                    |                                             | 35.7                 | 8.3                   | 0.0                 |                                                      |         | 0.2322               | 0.3160                | 0.7724              |
| <i>Actinomyces dentalis</i>        | 0.203                              | 0.334                 | 0.480               |                    |                                             | 78.6                 | 75.0                  | 72.7                |                                                      |         | 0.4212               | 0.4281                | 0.7126              |
| <i>Actinomyces gerenceriae</i>     | 0.978                              | 3.342                 | 2.639               |                    |                                             | 100.0                | 100.0                 | 100.0               |                                                      |         | 0.4860               | 0.4533                | 0.4329              |
| <i>Actinomyces israelii</i>        | 0.304                              | 0.220                 | 0.210               |                    |                                             | 71.4                 | 50.0                  | 45.5                |                                                      |         | 0.3526               | 0.3223                | 0.3426              |
| <i>Actinomyces johnsonii</i>       | 0.353                              | 0.361                 | 0.441               |                    |                                             | 100.0                | 91.7                  | 100.0               |                                                      |         | 0.3437               | 0.2795                | 0.3412              |
| <i>Actinomyces massiliensis</i>    | 0.278                              | 0.295                 | 0.301               |                    |                                             | 64.3                 | 91.7                  | 90.9                |                                                      |         | 0.4826               | 0.3420                | 0.3649              |
| <i>Actinomyces meyeri</i>          | 0.503                              | 0.329                 | 0.133               |                    |                                             | 78.6                 | 66.7                  | 36.4                |                                                      |         | 0.6144               | 0.6760                | 0.7496              |
| <i>Actinomyces naeslundii</i>      | 0.959                              | 1.185                 | 1.888               |                    |                                             | 100.0                | 100.0                 | 100.0               |                                                      |         | 0.6144               | 0.6760                | 0.7496              |
| <i>A. naeslundii</i> II            | 0.093                              | 0.115                 | 0.087               |                    |                                             | 21.4                 | 33.3                  | 36.4                |                                                      |         | 0.5069               | 0.3898                | 0.1892              |
| <i>Actinomyces odontolyticus</i>   | 0.610                              | 0.323                 | 0.277               |                    |                                             | 78.6                 | 75.0                  | 45.5                |                                                      |         | 0.3972               | 0.3898                | 0.3179              |
| <i>Actinomyces oris</i>            | 0.348                              | 0.407                 | 0.585               |                    |                                             | 100.0                | 100.0                 | 100.0               |                                                      |         | 0.2336               | 0.3853                | 0.3783              |
| <i>Actinomyces</i> sp. HOT848      | 0.619                              | 0.232                 | 0.558               |                    |                                             | 100.0                | 75.0                  | 90.9                |                                                      |         | 0.3513               | 0.3834                | 0.4410              |
| <i>Actinomyces</i> sp. HOT169      | 0.385                              | 0.547                 | 0.459               |                    |                                             | 85.7                 | 100.0                 | 90.9                |                                                      |         | 0.3861               | 0.4256                | 0.4166              |
| <i>Actinomyces</i> sp. HOT170      | 0.419                              | 0.521                 | 0.565               |                    |                                             | 100.0                | 100.0                 | 100.0               |                                                      |         | 0.3591               | 0.2768                | 0.4168              |
| <i>Actinomyces</i> sp. HOT171      | 0.456                              | 0.278                 | 0.900               |                    |                                             | 100.0                | 100.0                 | 90.9                |                                                      |         | 0.4123               | 0.6323                | 0.6249              |
| <i>Actinomyces</i> sp. HOT175      | 0.467                              | 1.047                 | 0.824               |                    |                                             | 100.0                | 100.0                 | 100.0               |                                                      |         | 0.4400               | 0.6365                | 0.5877              |
| <i>Actinomyces</i> sp. HOT177      | 0.054                              | 0.275                 | 0.230               |                    |                                             | 7.1                  | 41.7                  | 54.5                |                                                      |         | 0.3765               | 0.4517                | 0.3310              |
| <i>Actinomyces</i> sp. HOT178      | 0.325                              | 0.231                 | 0.200               |                    |                                             | 85.7                 | 66.7                  | 54.5                |                                                      |         | 0.4757               | 0.4450                | 0.3180              |
| <i>Actinomyces</i> sp. HOT180      | 0.440                              | 0.512                 | 0.592               |                    |                                             | 92.9                 | 100.0                 | 100.0               |                                                      |         | 0.2247               | 0.6133                | 0.4166              |
| <i>Actinomyces</i> sp. HOT414      | 0.211                              | 0.125                 | 0.060               |                    |                                             | 78.6                 | 25.0                  | 18.2                |                                                      | 0.003   | 0.3233               | 0.6730                | 0.3273              |
| <i>Actinomyces</i> sp. HOT446      | 0.333                              | 0.288                 | 0.079               |                    |                                             | 57.1                 | 41.7                  | 18.2                |                                                      |         | 0.5758               | 1.0605                | 0.4517              |
| <i>Actinomyces</i> sp. HOT448      | 0.435                              | 4.644                 | 0.999               |                    |                                             | 85.7                 | 91.7                  | 81.8                |                                                      |         | 0.3970               | 0.5923                | 0.4517              |
| <i>Actinomyces</i> sp. HOT449      | 0.239                              | 0.317                 | 0.423               |                    |                                             | 78.6                 | 83.3                  | 54.5                |                                                      |         | 0.2356               | 0.2939                | 0.4342              |
| <i>Actinomyces</i> sp. HOT525      | 0.250                              | 0.327                 | 0.319               |                    |                                             | 57.1                 | 91.7                  | 72.7                |                                                      |         | 0.3388               | 0.3675                | 0.4554              |
| <i>Actinomyces</i> sp. HOT877      | 0.381                              | 0.522                 | 0.488               |                    |                                             | 92.9                 | 100.0                 | 90.9                |                                                      |         | 0.2738               | 0.3635                | 0.3453              |
| <i>Actinomyces</i> sp. HOT896      | 0.250                              | 0.102                 | 0.282               |                    |                                             | 64.3                 | 25.0                  | 54.5                |                                                      |         | 0.2926               | 0.2673                | 0.2936              |
| <i>Actinomyces</i> sp. HOT897      | 0.194                              | 0.155                 | 0.200               |                    |                                             | 64.3                 | 50.0                  | 63.6                |                                                      |         | 0.3635               | 0.1734                | 0.2766              |
| <i>Actinomyces timonensis</i>      | 0.122                              | 0.033                 | 0.000               |                    |                                             | 28.6                 | 8.3                   | 0.0                 |                                                      |         | 0.4033               | 0.2746                | 0.4016              |
| <i>Atopobium parvulum</i>          | 0.438                              | 0.063                 | 0.406               |                    |                                             | 85.7                 | 25.0                  | 90.9                |                                                      | 0.001   | 0.2945               | 0.1994                | 0.3866              |
| <i>Atopobium rimae</i>             | 0.215                              | 0.244                 | 0.314               |                    |                                             | 64.3                 | 66.7                  | 63.6                |                                                      |         | 0.3534               | 0.4146                | 0.5458              |
| <i>Corynebacterium durum</i>       | 0.484                              | 0.361                 | 0.787               |                    |                                             | 100.0                | 91.7                  | 90.9                |                                                      |         | 0.4757               | 0.4882                | 1.6693              |
| <i>Corynebacterium matruchotii</i> | 2.685                              | 5.189                 | 5.317               |                    |                                             | 100.0                | 100.0                 | 100.0               |                                                      |         | 0.5728               | 2.5268                | 1.6693              |
| <i>Cryptobacterium curtum</i>      | 0.358                              | 0.148                 | 0.292               |                    |                                             | 64.3                 | 25.0                  | 54.5                |                                                      |         | 0.5125               | 0.3932                | 0.2830              |
| <i>Olsenella</i> sp. HOT807        | 0.187                              | 0.187                 | 0.087               |                    |                                             | 42.9                 | 50.0                  | 45.5                |                                                      |         | 0.4411               | 0.3932                | 0.2528              |
| <i>Rothia aeria</i>                | 0.692                              | 0.465                 | 0.603               |                    |                                             | 92.9                 | 91.7                  | 81.8                |                                                      |         | 0.4774               | 0.4647                | 0.3778              |
| <i>Rothia dentocariosa</i>         | 0.076                              | 0.300                 | 0.055               |                    |                                             | 14.3                 | 50.0                  | 18.2                |                                                      |         | 0.2062               | 0.4241                | 0.4168              |
| <i>Alloprevotella rava</i>         | 0.172                              | 0.267                 | 0.324               |                    |                                             | 71.4                 | 50.0                  | 63.6                |                                                      |         | 0.2504               | 0.3755                | 0.4168              |
| <i>Alloprevotella</i> sp. HOT308   | 0.215                              | 0.270                 | 0.273               |                    |                                             | 42.9                 | 66.7                  | 63.6                |                                                      |         | 0.4845               | 0.3703                | 0.3514              |
| <i>Alloprevotella</i> sp. HOT473   | 0.321                              | 0.176                 | 0.197               |                    |                                             | 64.3                 | 50.0                  | 54.5                |                                                      |         | 0.4549               | 0.3811                | 0.3946              |
| <i>Alloprevotella</i> sp. HOT474   | 0.265                              | 0.207                 | 0.158               |                    |                                             | 64.3                 | 41.7                  | 36.4                |                                                      |         | 0.4445               | 0.4417                | 0.3726              |
| <i>Alloprevotella</i> sp. HOT912   | 0.311                              | 0.179                 | 0.104               |                    |                                             | 64.3                 | 33.3                  | 27.3                |                                                      |         | 0.3618               | 0.4417                | 0.2939              |
| <i>Alloprevotella</i> sp. HOT913   | 0.230                              | 0.130                 | 0.149               |                    |                                             | 71.4                 | 25.0                  | 36.4                |                                                      |         | 0.3430               | 0.3663                | 0.3440              |
| <i>Alloprevotella</i> sp. HOT914   | 0.299                              | 0.201                 | 0.173               |                    |                                             | 71.4                 | 58.3                  | 45.5                |                                                      |         | 0.4220               | 0.4191                | 0.5388              |

(continued)

Appendix Table 2. (continued)

| Species/HOMD Taxon                    | Mean Species Prevalence, %         |                       |                       |              | Proportion in Which Species Was Detected, % |                      |                       |                     | Median Species Prevalence among Positive Subjects, % |           |                       |                       |                     |                     |
|---------------------------------------|------------------------------------|-----------------------|-----------------------|--------------|---------------------------------------------|----------------------|-----------------------|---------------------|------------------------------------------------------|-----------|-----------------------|-----------------------|---------------------|---------------------|
|                                       | Romania: High Prevalence of Caries |                       | Sweden: Caries Active |              | Romania: High Prevalence of Caries          |                      | Sweden: Caries Active |                     | Romania: High Prevalence of Caries                   |           | Sweden: Caries Active |                       | Sweden: Caries Free |                     |
|                                       | Prevalence of Caries               | Sweden: Caries Active | Sweden: Caries Free   | $P_{GROUP}$  | $P_{TREND}$                                 | Prevalence of Caries | Sweden: Caries Active | Sweden: Caries Free | $\chi^2$                                             | $P$ Value | Prevalence of Caries  | Sweden: Caries Active | Sweden: Caries Free | Sweden: Caries Free |
| <i>Alloprevotella tannerae</i>        | 1.116                              | 6.421                 | 1.017                 |              |                                             | 100.0                | 100.0                 | 100.0               |                                                      |           | 0.3968                | 0.6626                | 0.6897              |                     |
| <i>Bacteroidetes</i> [G-3] sp. HOT280 | 0.168                              | 0.020                 | 0.000                 |              |                                             | 35.7                 | 8.3                   | 0.0                 |                                                      |           | 0.4279                | 0.2454                | 0.0000              |                     |
| <i>Bacteroidetes</i> [G-3] sp. HOT365 | 0.140                              | 0.129                 | 0.000                 |              |                                             | 28.6                 | 16.7                  | 0.0                 |                                                      |           | 0.4561                | 0.7738                | 0.0000              |                     |
| <i>Bacteroidetes</i> [G-5] sp. HOT505 | 0.370                              | 0.000                 | 0.000                 | 0.001, 0.001 |                                             | 50.0                 | 0.0                   | 0.0                 |                                                      | 0.001     | 0.4630                | 0.3301                | 0.0000              |                     |
| <i>Bacteroidetes</i> [G-5] sp. HOT507 | 0.009                              | 0.055                 | 0.000                 |              |                                             | 7.1                  | 16.7                  | 0.0                 |                                                      |           | 0.2257                | 0.4587                | 0.3397              |                     |
| <i>Bacteroidetes</i> [G-5] sp. HOT511 | 0.197                              | 0.172                 | 0.273                 |              |                                             | 42.9                 | 33.3                  | 54.5                |                                                      |           | 0.2379                | 0.4326                | 0.4149              |                     |
| <i>Bergeyella</i> sp. HOT322          | 0.390                              | 0.401                 | 0.445                 |              |                                             | 100.0                | 91.7                  | 100.0               |                                                      |           | 0.2588                | 0.3999                | 0.4472              |                     |
| <i>Bergeyella</i> sp. HOT900          | 0.396                              | 0.383                 | 0.368                 |              |                                             | 92.9                 | 75.0                  | 81.8                |                                                      |           | 0.2854                | 0.5674                | 0.4472              |                     |
| <i>Bergeyella</i> sp. HOT907          | 0.146                              | 0.189                 | 0.105                 |              |                                             | 42.9                 | 25.0                  | 18.2                |                                                      |           | 0.4678                | 0.4644                | 0.4842              |                     |
| <i>Cabnocytophaga gingivalis</i>      | 0.663                              | 0.356                 | 0.463                 |              |                                             | 100.0                | 91.7                  | 100.0               |                                                      |           | 0.5277                | 0.4176                | 0.4713              |                     |
| <i>Cabnocytophaga granulosa</i>       | 0.886                              | 0.785                 | 0.979                 |              |                                             | 100.0                | 100.0                 | 100.0               |                                                      |           | 0.6856                | 0.4341                | 0.3855              |                     |
| <i>Cabnocytophaga haemolytica</i>     | 0.296                              | 0.204                 | 0.220                 |              |                                             | 50.0                 | 50.0                  | 63.6                |                                                      |           | 0.8253                | 0.4725                | 0.6077              |                     |
| <i>Cabnocytophaga leadbetteri</i>     | 1.515                              | 0.617                 | 0.921                 |              |                                             | 92.9                 | 100.0                 | 100.0               |                                                      |           | 0.8253                | 0.4725                | 0.6360              |                     |
| <i>Cabnocytophaga ochracea</i>        | 0.034                              | 0.247                 | 0.139                 |              |                                             | 21.4                 | 50.0                  | 36.4                |                                                      |           | 0.2925                | 0.4647                | 0.3440              |                     |
| <i>Cabnocytophaga</i> sp. HOT323      | 0.324                              | 0.433                 | 0.194                 |              |                                             | 64.3                 | 75.0                  | 63.6                |                                                      |           | 0.3287                | 0.6572                | 0.3440              |                     |
| <i>Cabnocytophaga</i> sp. HOT324      | 0.263                              | 0.539                 | 0.264                 |              |                                             | 57.1                 | 83.3                  | 63.6                |                                                      |           | 0.3228                | 0.3783                | 0.3755              |                     |
| <i>Cabnocytophaga</i> sp. HOT326      | 0.271                              | 0.508                 | 0.418                 |              |                                             | 78.6                 | 91.7                  | 100.0               |                                                      |           | 0.3272                | 0.3650                | 0.3783              |                     |
| <i>Cabnocytophaga</i> sp. HOT332      | 0.416                              | 0.811                 | 0.254                 |              |                                             | 92.9                 | 75.0                  | 54.5                |                                                      |           | 0.4313                | 0.4780                | 0.3882              |                     |
| <i>Cabnocytophaga</i> sp. HOT335      | 0.299                              | 0.345                 | 0.629                 |              |                                             | 78.6                 | 58.3                  | 90.9                |                                                      |           | 0.4114                | 0.4020                | 0.3594              |                     |
| <i>Cabnocytophaga</i> sp. HOT336      | 0.250                              | 0.479                 | 0.489                 |              |                                             | 64.3                 | 91.7                  | 90.9                |                                                      |           | 0.4678                | 0.4572                | 0.4507              |                     |
| <i>Cabnocytophaga</i> sp. HOT338      | 0.287                              | 0.394                 | 0.405                 |              |                                             | 64.3                 | 83.3                  | 72.7                |                                                      |           | 0.4512                | 0.3834                | 0.3962              |                     |
| <i>Cabnocytophaga</i> sp. HOT412      | 0.283                              | 0.345                 | 0.631                 |              |                                             | 71.4                 | 75.0                  | 90.9                |                                                      |           | 0.4830                | 0.3834                | 0.3239              |                     |
| <i>Cabnocytophaga</i> sp. HOT863      | 0.442                              | 0.205                 | 0.115                 |              |                                             | 71.4                 | 41.7                  | 36.4                |                                                      |           | 0.5862                | 0.5340                | 0.2865              |                     |
| <i>Cabnocytophaga</i> sp. HOT864      | 0.566                              | 0.637                 | 0.276                 |              |                                             | 100.0                | 83.3                  | 90.9                |                                                      |           | 0.5190                | 0.6798                | 0.2549              |                     |
| <i>Cabnocytophaga</i> sp. HOT878      | 0.227                              | 0.000                 | 0.034                 |              |                                             | 42.9                 | 0.0                   | 9.1                 |                                                      |           | 0.4327                | 0.0000!               | 0.3726              |                     |
| <i>Cabnocytophaga</i> sp. HOT901      | 0.297                              | 0.000                 | 0.089                 |              |                                             | 42.9                 | 0.0                   | 18.2                |                                                      |           | 0.3186                | 0.3864                | 0.5848              |                     |
| <i>Cabnocytophaga</i> sp. HOT902      | 0.195                              | 0.195                 | 0.250                 |              |                                             | 57.1                 | 50.0                  | 45.5                |                                                      |           | 0.3145                | 0.3864                | 0.3445              |                     |
| <i>Cabnocytophaga</i> sp. HOT903      | 0.095                              | 0.154                 | 0.126                 |              |                                             | 28.6                 | 33.3                  | 36.4                |                                                      |           | 0.3961                | 0.3983                | 0.3445              |                     |
| <i>Cabnocytophaga</i> sp. HOT903      | 0.774                              | 0.461                 | 0.506                 |              |                                             | 100.0                | 83.3                  | 100.0               |                                                      |           | 0.2563                | 0.4179                | 0.3440              |                     |
| <i>Bacteroidales</i> [G-2] sp. HOT274 | 0.157                              | 0.502                 | 0.561                 | 0.016, 0.007 |                                             | 78.6                 | 83.3                  | 90.9                |                                                      |           | 0.2798                | 0.4969                | 0.2519              |                     |
| <i>Porphyromonas catonidae</i>        | 1.085                              | 0.855                 | 0.292                 |              |                                             | 92.9                 | 91.7                  | 81.8                |                                                      |           | 0.5682                | 0.5134                | 0.1975              |                     |
| <i>Porphyromonas endodontalis</i>     | 0.532                              | 0.301                 | 0.130                 |              |                                             | 64.3                 | 41.7                  | 36.4                |                                                      |           | 0.4473                | 0.3523                | 0.3464              |                     |
| <i>Porphyromonas gingivalis</i>       | 0.276                              | 0.031                 | 0.000                 |              |                                             | 28.6                 | 8.3                   | 0.0                 |                                                      |           | 0.4135                | 0.4417                | 0.3985              |                     |
| <i>Porphyromonas</i> sp. HOT275       | 0.359                              | 0.295                 | 0.267                 |              |                                             | 85.7                 | 33.3                  | 54.5                |                                                      |           | 0.4582                | 0.5159                | 0.3946              |                     |
| <i>Porphyromonas</i> sp. HOT277       | 0.265                              | 0.171                 | 0.072                 |              |                                             | 50.0                 | 58.3                  | 18.2                |                                                      |           | 0.5240                | 0.4816                | 0.3726              |                     |
| <i>Porphyromonas</i> sp. HOT278       | 0.783                              | 0.294                 | 0.294                 |              |                                             | 78.6                 | 75.0                  | 63.6                |                                                      |           | 1.0278                | 0.3932                | 0.3443              |                     |
| <i>Porphyromonas</i> sp. HOT279       | 2.147                              | 0.371                 | 0.923                 |              |                                             | 92.9                 | 83.3                  | 100.0               |                                                      |           | 0.6886                | 0.3898                | 0.3443              |                     |
| <i>Porphyromonas</i> sp. HOT284       | 0.226                              | 0.222                 | 0.176                 |              |                                             | 64.3                 | 58.3                  | 45.5                |                                                      |           | 0.2046                | 0.1868                | 0.4166              |                     |
| <i>Porphyromonas</i> sp. HOT395       | 0.078                              | 0.000                 | 0.000                 |              |                                             | 21.4                 | 0.0                   | 0.0                 |                                                      |           | 0.3499                | 0.5931                | 0.1679              |                     |
| <i>Prevotella baroniae</i>            | 0.186                              | 0.099                 | 0.015                 |              |                                             | 50.0                 | 16.7                  | 9.1                 |                                                      |           | 0.3868                | 0.8545                | 0.2927              |                     |
| <i>Prevotella buccae</i>              | 0.254                              | 0.267                 | 0.146                 |              |                                             | 64.3                 | 33.3                  | 45.5                |                                                      |           | 0.3635                | 0.7795                | 0.3183              |                     |
| <i>Prevotella dentalis</i>            | 0.117                              | 0.038                 | 0.000                 | 0.022, 0.008 |                                             | 42.9                 | 8.3                   | 0.0                 |                                                      |           | 0.4279                | 0.7735                | 0.9540              |                     |
| <i>Prevotella denticola</i>           | 1.583                              | 1.102                 | 2.096                 |              |                                             | 92.9                 | 91.7                  | 81.8                |                                                      |           | 0.5186                | 0.5190                | 0.5847              |                     |
| <i>Prevotella enoea</i>               | 0.279                              | 0.139                 | 0.064                 |              |                                             | 57.1                 | 41.7                  | 27.3                |                                                      |           | 0.4844                | 0.3985                | 0.4198              |                     |
| <i>Prevotella fusca</i>               | 0.066                              | 0.066                 | 0.263                 |              |                                             | 14.3                 | 8.3                   | 36.4                |                                                      |           | 0.3854                | 0.5806                | 0.4714              |                     |

(continued)

Appendix Table 2. (continued)

| Species/HOMD Taxon                         | Mean Species Prevalence, %         |                       |                     |                                                    | Proportion in Which Species Was Detected, % |                       |                     |                        | Median Species Prevalence among Positive Subjects, % |                       |                     |                     |
|--------------------------------------------|------------------------------------|-----------------------|---------------------|----------------------------------------------------|---------------------------------------------|-----------------------|---------------------|------------------------|------------------------------------------------------|-----------------------|---------------------|---------------------|
|                                            | Romania: High Prevalence of Caries | Sweden: Caries Active | Sweden: Caries Free | P <sub>GROUP</sub> <sup>a</sup> P <sub>TREND</sub> | Romania: High Prevalence of Caries          | Sweden: Caries Active | Sweden: Caries Free | χ <sup>2</sup> P Value | Romania: High Prevalence of Caries                   | Sweden: Caries Active | Sweden: Caries Free | Sweden: Caries Free |
| <i>Prevotella histicola</i>                | 0.248                              | 0.296                 | 0.657               |                                                    | 42.9                                        | 58.3                  | 54.5                |                        | 0.4578                                               | 0.4667                | 0.6360              | 0.6360              |
| <i>Prevotella intermedia</i>               | 0.929                              | 0.275                 | 1.257               |                                                    | 71.4                                        | 41.7                  | 27.3                |                        | 0.4411                                               | 0.4897                | 0.3962              | 0.3962              |
| <i>Prevotella loeschii</i>                 | 0.051                              | 0.082                 | 0.148               |                                                    | 21.4                                        | 8.3                   | 45.5                |                        | 0.3255                                               | 0.5172                | 0.4657              | 0.4657              |
| <i>Prevotella maculosa</i>                 | 0.503                              | 0.818                 | 0.941               |                                                    | 92.9                                        | 100.0                 | 90.9                |                        | 0.3255                                               | 0.4702                | 0.7149              | 0.7149              |
| <i>Prevotella marshii</i>                  | 0.161                              | 0.135                 | 0.040               |                                                    | 50.0                                        | 33.3                  | 18.2                |                        | 0.4232                                               | 0.4942                | 0.4678              | 0.4678              |
| <i>Prevotella melaninogenica</i>           | 2.867                              | 0.752                 | 1.693               |                                                    | 100.0                                       | 100.0                 | 100.0               |                        | 0.7137                                               | 0.4165                | 0.4678              | 0.4678              |
| <i>Prevotella micans</i>                   | 0.633                              | 0.238                 | 0.172               | 0.029, 0.007                                       | 92.9                                        | 75.0                  | 54.5                | 0.004                  | 0.6777                                               | 0.3229                | 0.2682              | 0.2682              |
| <i>Prevotella multiformis</i>              | 0.696                              | 0.048                 | 0.000               | 0.003, 0.001                                       | 57.1                                        | 16.7                  | 0.0                 |                        | 0.6063                                               | 2.5250                | 3.11679             | 3.11679             |
| <i>Prevotella nigrescens</i>               | 1.154                              | 5.755                 | 5.175               |                                                    | 100.0                                       | 91.7                  | 100.0               |                        | 0.5837                                               | 2.5250                | 2.4885              | 2.4885              |
| <i>Prevotella oralis</i>                   | 1.220                              | 0.059                 | 0.082               |                                                    | 42.9                                        | 16.7                  | 18.2                |                        | 0.6814                                               | 1.0780                | 1.3485              | 1.3485              |
| <i>Prevotella oris</i>                     | 1.220                              | 3.013                 | 2.618               |                                                    | 100.0                                       | 100.0                 | 100.0               |                        | 0.6419                                               | 0.8989                | 1.0429              | 1.0429              |
| <i>Prevotella oulorum</i>                  | 0.756                              | 0.733                 | 0.884               |                                                    | 92.9                                        | 91.7                  | 100.0               |                        | 0.6419                                               | 0.7517                | 0.8371              | 0.8371              |
| <i>Prevotella pallens</i>                  | 0.905                              | 0.424                 | 0.552               |                                                    | 71.4                                        | 66.7                  | 54.5                |                        | 0.6615                                               | 0.7517                | 0.5397              | 0.5397              |
| <i>Prevotella pleuritid</i>                | 0.309                              | 0.870                 | 0.298               |                                                    | 57.1                                        | 75.0                  | 36.4                |                        | 0.2758                                               | 0.4647                | 0.3739              | 0.3739              |
| <i>Prevotella pleuritid</i>                | 0.312                              | 0.477                 | 0.396               |                                                    | 85.7                                        | 100.0                 | 90.9                |                        | 0.3359                                               | 0.3684                | 0.3784              | 0.3784              |
| <i>Prevotella saccharolytica</i>           | 0.484                              | 0.317                 | 0.355               |                                                    | 71.4                                        | 75.0                  | 81.8                |                        | 0.3595                                               | 0.3834                | 0.4924              | 0.4924              |
| <i>Prevotella salivae</i>                  | 0.126                              | 0.149                 | 0.174               |                                                    | 42.9                                        | 33.3                  | 27.3                |                        | 0.3380                                               | 0.6973                | 0.8321              | 0.8321              |
| <i>Prevotella scopas</i>                   | 0.544                              | 0.958                 | 0.664               |                                                    | 85.7                                        | 91.7                  | 90.9                |                        | 0.5078                                               | 0.5112                | 0.7370              | 0.7370              |
| <i>Prevotella</i> sp. HOT292               | 0.138                              | 0.287                 | 0.151               |                                                    | 28.6                                        | 66.7                  | 36.4                |                        | 0.4561                                               | 0.3443                | 0.3514              | 0.3514              |
| <i>Prevotella</i> sp. HOT293               | 0.091                              | 0.108                 | 0.032               |                                                    | 21.4                                        | 33.3                  | 9.1                 |                        | 0.3106                                               | 0.1736                | 0.3514              | 0.3514              |
| <i>Prevotella</i> sp. HOT296               | 0.235                              | 0.133                 | 0.110               |                                                    | 64.3                                        | 41.7                  | 36.4                |                        | 0.2530                                               | 0.2519                | 0.3866              | 0.3866              |
| <i>Prevotella</i> sp. HOT299               | 0.302                              | 0.252                 | 0.491               |                                                    | 64.3                                        | 75.0                  | 81.8                |                        | 0.2766                                               | 0.3607                | 0.4744              | 0.4744              |
| <i>Prevotella</i> sp. HOT300               | 0.288                              | 0.192                 | 0.075               | 0.03, 0.009                                        | 85.7                                        | 41.7                  | 18.2                | 0.001                  | 0.2766                                               | 0.3755                | 0.4148              | 0.4148              |
| <i>Prevotella</i> sp. HOT301               | 0.070                              | 0.152                 | 0.000               |                                                    | 21.4                                        | 25.0                  | 0.0                 |                        | 0.3235                                               | 0.3489                | 0.1507              | 0.1507              |
| <i>Prevotella</i> sp. HOT304               | 0.075                              | 0.016                 | 0.027               |                                                    | 14.3                                        | 8.3                   | 18.2                |                        | 0.5612                                               | 0.2476                | 0.3440              | 0.3440              |
| <i>Prevotella</i> sp. HOT305               | 0.337                              | 0.242                 | 0.304               |                                                    | 57.1                                        | 50.0                  | 63.6                |                        | 0.5388                                               | 0.2937                | 0.3755              | 0.3755              |
| <i>Prevotella</i> sp. HOT306               | 0.034                              | 0.000                 | 0.134               |                                                    | 7.1                                         | 0.0                   | 36.4                |                        | 0.3521                                               | 0.4647                | 0.3769              | 0.3769              |
| <i>Prevotella</i> sp. HOT309               | 0.571                              | 0.256                 | 0.333               |                                                    | 78.6                                        | 58.3                  | 72.7                |                        | 0.3348                                               | 0.4816                | 0.4168              | 0.4168              |
| <i>Prevotella</i> sp. HOT313               | 0.585                              | 0.759                 | 1.248               |                                                    | 78.6                                        | 66.7                  | 81.8                |                        | 0.3522                                               | 0.6626                | 0.4410              | 0.4410              |
| <i>Prevotella</i> sp. HOT314               | 0.152                              | 0.012                 | 0.029               |                                                    | 42.9                                        | 8.3                   | 9.1                 |                        | 0.5782                                               | 1.4711                | 1.3103              | 1.3103              |
| <i>Prevotella</i> sp. HOT315               | 2.133                              | 1.937                 | 2.009               |                                                    | 100.0                                       | 100.0                 | 100.0               |                        | 1.0465                                               | 0.9338                | 1.3103              | 1.3103              |
| <i>Prevotella</i> sp. HOT317               | 0.151                              | 0.136                 | 0.029               |                                                    | 28.6                                        | 25.0                  | 9.1                 |                        | 0.4512                                               | 0.3834                | 0.3180              | 0.3180              |
| <i>Prevotella</i> sp. HOT396               | 0.943                              | 0.000                 | 0.000               |                                                    | 78.6                                        | 0.0                   | 0.0                 |                        | 0.4516                                               | 0.4702                | 0.6776              | 0.6776              |
| <i>Prevotella</i> sp. HOT443               | 0.401                              | 0.581                 | 0.801               |                                                    | 86.6                                        | 100.0                 | 81.8                |                        | 0.4416                                               | 0.4487                | 0.6775              | 0.6775              |
| <i>Prevotella</i> sp. HOT472               | 0.272                              | 0.231                 | 0.166               |                                                    | 64.3                                        | 50.0                  | 27.3                |                        | 0.5728                                               | 0.3907                | 0.5022              | 0.5022              |
| <i>Prevotella</i> sp. HOT475               | 0.726                              | 0.311                 | 0.834               |                                                    | 100.0                                       | 66.7                  | 81.8                |                        | 0.5806                                               | 0.2484                | 0.3931              | 0.3931              |
| <i>Prevotella veroralis</i>                | 0.189                              | 0.058                 | 0.134               |                                                    | 42.9                                        | 25.0                  | 27.3                |                        | 0.4606                                               | 0.4926                | 0.8396              | 0.8396              |
| <i>Tannerella forsythia</i>                | 0.883                              | 1.118                 | 1.361               |                                                    | 100.0                                       | 100.0                 | 90.9                |                        | 0.4572                                               | 0.3988                | 0.6474              | 0.6474              |
| <i>Tannerella</i> sp. HOT286               | 0.406                              | 0.224                 | 0.309               |                                                    | 85.7                                        | 75.0                  | 72.7                |                        | 0.4512                                               | 0.2119                | 0.3171              | 0.3171              |
| <i>Tannerella</i> sp. HOT808               | 0.231                              | 0.000                 | 0.044               | 0.008, 0.027                                       | 50.0                                        | 0.0                   | 18.2                |                        | 0.4932                                               | 0.4647                | 0.4438              | 0.4438              |
| <i>Tannerella</i> sp. HOT916               | 1.325                              | 0.291                 | 0.531               |                                                    | 100.0                                       | 58.3                  | 72.7                |                        | 0.4137                                               | 0.2850                | 0.3312              | 0.3312              |
| <i>Abiotrophia defectiva</i>               | 0.482                              | 0.203                 | 0.255               |                                                    | 92.9                                        | 91.7                  | 90.9                | 0.004                  | 0.2712                                               | 0.2163                | 0.2490              | 0.2490              |
| <i>Catonella morbi</i>                     | 0.213                              | 0.050                 | 0.000               | 0.004, 0.001                                       | 57.1                                        | 16.7                  | 0.0                 |                        | 0.4279                                               | 0.3834                | 0.0000              | 0.0000              |
| <i>Catonella</i> sp. HOT164                | 0.089                              | 0.054                 | 0.000               |                                                    | 14.3                                        | 8.3                   | 0.0                 |                        | 0.3022                                               | 0.4647                | 0.0000              | 0.0000              |
| <i>Catonella</i> sp. HOT451                | 0.025                              | 0.059                 | 0.000               |                                                    | 14.3                                        | 16.7                  | 0.0                 |                        | 0.3428                                               | 0.3660                | 0.5271              | 0.5271              |
| <i>Clostridiales</i> [F-1][G-1] sp. HOT093 |                                    |                       |                     |                                                    |                                             |                       |                     |                        |                                                      |                       |                     |                     |

(continued)

Appendix Table 2. (continued)

| Species/HOMD Taxon                                | Mean Species Prevalence, %         |                       |                       |                                         | Proportion in Which Species Was Detected, % |                       |                       |                        | Median Species Prevalence among Positive Subjects, % |                       |                       |                       |                     |  |
|---------------------------------------------------|------------------------------------|-----------------------|-----------------------|-----------------------------------------|---------------------------------------------|-----------------------|-----------------------|------------------------|------------------------------------------------------|-----------------------|-----------------------|-----------------------|---------------------|--|
|                                                   | Romania: High Prevalence of Caries |                       | Sweden: Caries Active |                                         | Romania: High Prevalence of Caries          |                       | Sweden: Caries Active |                        | Romania: High Prevalence of Caries                   |                       | Sweden: Caries Active |                       | Sweden: Caries Free |  |
|                                                   | Romania: High Prevalence of Caries | Sweden: Caries Active | Sweden: Caries Free   | P <sub>GROUP</sub> * P <sub>TREND</sub> | Romania: High Prevalence of Caries          | Sweden: Caries Active | Sweden: Caries Free   | χ <sup>2</sup> P Value | Romania: High Prevalence of Caries                   | Sweden: Caries Active | Sweden: Caries Free   | Sweden: Caries Active | Sweden: Caries Free |  |
| <i>Clostridiales</i> [F-2][G-1] sp. HOT075        | 0.499                              | 0.272                 | 0.951                 |                                         | 92.9                                        | 83.3                  | 81.8                  |                        | 0.4702                                               | 0.3636                | 0.6360                | 0.3636                | 0.6360              |  |
| <i>Clostridiales</i> [F-2][G-2] sp. HOT085        | 0.393                              | 0.132                 | 0.335                 |                                         | 64.3                                        | 50.0                  | 54.5                  |                        | 0.6145                                               | 0.4382                | 0.6360                | 0.4382                | 0.6360              |  |
| <i>Dialister invisus</i>                          | 0.513                              | 0.820                 | 0.966                 |                                         | 92.9                                        | 91.7                  | 100.0                 |                        | 0.5532                                               | 0.7128                | 0.3852                | 0.7128                | 0.3852              |  |
| <i>Dialister microaerophilus</i>                  | 0.019                              | 0.103                 | 0.023                 |                                         | 7.1                                         | 16.7                  | 9.1                   |                        | 0.5257                                               | 0.7327                | 0.2992                | 0.7327                | 0.2992              |  |
| <i>Dialister pneumosintes</i>                     | 0.377                              | 0.244                 | 0.101                 |                                         | 64.3                                        | 41.7                  | 27.3                  |                        | 0.5257                                               | 0.3853                | 0.3726                | 0.3853                | 0.3726              |  |
| <i>Eubacterium</i> [1][G-1] <i>infirmum</i>       | 0.334                              | 0.174                 | 0.199                 |                                         | 64.3                                        | 50.0                  | 36.4                  |                        | 0.4561                                               | 0.4745                | 0.3726                | 0.4745                | 0.3726              |  |
| <i>Eubacterium</i> [1][G-1] <i>sulci</i>          | 0.099                              | 0.143                 | 0.020                 |                                         | 28.6                                        | 16.7                  | 9.1                   |                        | 0.3689                                               | 0.4202                | 0.2882                | 0.4202                | 0.2882              |  |
| <i>Eubacterium</i> [1][G-3] <i>brachy</i>         | 0.156                              | 0.297                 | 0.255                 |                                         | 50.0                                        | 83.3                  | 63.6                  |                        | 0.1658                                               | 0.3573                | 0.3445                | 0.3573                | 0.3445              |  |
| <i>Eubacterium</i> [1][G-5] <i>saphenum</i>       | 0.072                              | 0.116                 | 0.000                 |                                         | 35.7                                        | 25.0                  | 0.0                   |                        | 0.2035                                               | 0.4164                | 0.5459                | 0.4164                | 0.5459              |  |
| <i>Eubacterium</i> [1][G-7] <i>yurii</i>          | 0.295                              | 0.384                 | 0.449                 |                                         | 92.9                                        | 91.7                  | 90.9                  |                        | 0.2976                                               | 0.3811                | 0.5217                | 0.3811                | 0.5217              |  |
| <i>Filifactor alovis</i>                          | 0.152                              | 0.198                 | 0.000                 |                                         | 50.0                                        | 33.3                  | 0.0                   |                        | 0.2235                                               | 0.3755                | 0.0000                | 0.3755                | 0.0000              |  |
| <i>Gemella bergeri</i>                            | 0.000                              | 0.062                 | 0.000                 |                                         | 0.0                                         | 25.0                  | 0.0                   |                        | 0.4169                                               | 0.2792                | 0.2913                | 0.2792                | 0.2913              |  |
| <i>Gemella haemolysans</i>                        | 0.414                              | 0.363                 | 0.239                 |                                         | 100.0                                       | 91.7                  | 81.8                  |                        | 0.6220                                               | 0.3177                | 0.3312                | 0.3177                | 0.3312              |  |
| <i>Gemella morbillorum</i>                        | 1.251                              | 0.816                 | 1.199                 |                                         | 92.9                                        | 100.0                 | 100.0                 |                        | 0.6439                                               | 0.3915                | 0.5852                | 0.3915                | 0.5852              |  |
| <i>Gemella sanguinis</i>                          | 0.274                              | 0.343                 | 0.409                 |                                         | 78.6                                        | 83.3                  | 81.8                  |                        | 0.4582                                               | 0.3827                | 0.4357                | 0.3827                | 0.4357              |  |
| <i>Granulicatella adiacens</i>                    | 1.073                              | 0.732                 | 0.483                 |                                         | 100.0                                       | 100.0                 | 100.0                 |                        | 0.5966                                               | 0.2854                | 0.3783                | 0.2854                | 0.3783              |  |
| <i>Granulicatella elegans</i>                     | 0.489                              | 0.270                 | 0.253                 |                                         | 100.0                                       | 75.0                  | 54.5                  |                        | 0.3297                                               | 0.3181                | 0.3649                | 0.3181                | 0.3649              |  |
| <i>Johnsonella ignava</i>                         | 0.221                              | 0.146                 | 0.230                 |                                         | 71.4                                        | 41.7                  | 54.5                  |                        | 0.4030                                               | 0.1966                | 0.3241                | 0.1966                | 0.3241              |  |
| <i>Johnsonella</i> sp. HOT166                     | 0.256                              | 0.030                 | 0.000                 | 0.022, 0.005                            | 42.9                                        | 16.7                  | 0.0                   |                        | 0.4396                                               | 0.1966                | 0.2199                | 0.1966                | 0.2199              |  |
| <i>Lachnoaerobaculum sabureum</i>                 | 0.442                              | 0.594                 | 0.513                 |                                         | 100.0                                       | 100.0                 | 100.0                 |                        | 0.3325                                               | 0.4580                | 0.5217                | 0.4580                | 0.5217              |  |
| <i>Lachnoaerobaculum umeaense</i>                 | 0.433                              | 0.372                 | 0.423                 |                                         | 100.0                                       | 91.7                  | 100.0                 |                        | 0.4279                                               | 0.3263                | 0.3796                | 0.3263                | 0.3796              |  |
| <i>Lachnoaerobaculum</i> sp. HOT083               | 0.222                              | 0.080                 | 0.020                 | 0.007, 0.005                            | 57.1                                        | 8.3                   | 9.1                   | 0.006                  | 0.3897                                               | 0.3358                | 0.3655                | 0.3358                | 0.3655              |  |
| <i>Lachnospiraceae</i> [G-2] sp. HOT088           | 0.229                              | 0.000                 | 0.103                 |                                         | 35.7                                        | 0.0                   | 27.3                  |                        | 0.3599                                               | 0.3666                | 0.3866                | 0.3666                | 0.3866              |  |
| <i>Lachnospiraceae</i> [G-2] sp. HOT096           | 0.118                              | 0.116                 | 0.098                 |                                         | 42.9                                        | 33.3                  | 18.2                  |                        | 0.2588                                               | 0.3625                | 0.4017                | 0.3625                | 0.4017              |  |
| <i>Lachnospiraceae</i> [G-3] sp. HOT100           | 0.305                              | 0.429                 | 0.367                 |                                         | 78.6                                        | 100.0                 | 90.9                  |                        | 0.2942                                               | 0.3305                | 0.3841                | 0.3305                | 0.3841              |  |
| <i>Lachnospiraceae</i> [G-3] sp. HOT100           | 0.164                              | 0.045                 | 0.000                 |                                         | 28.6                                        | 16.7                  | 0.0                   |                        | 0.3193                                               | 0.3699                | 0.6360                | 0.3699                | 0.6360              |  |
| <i>Lachnospiraceae</i> [G-8] sp. HOT500           | 0.062                              | 0.119                 | 0.058                 |                                         | 21.4                                        | 16.7                  | 9.1                   |                        | 0.3069                                               | 0.7140                | 0.6360                | 0.7140                | 0.6360              |  |
| <i>Lactobacillus gasseri</i>                      | 0.077                              | 0.000                 | 0.000                 |                                         | 21.4                                        | 0.0                   | 0.0                   |                        | 0.2504                                               | 0.0000                | 0.0000                | 0.0000                | 0.0000              |  |
| <i>Lactobacillus</i> sp. HOT461                   | 0.039                              | 0.000                 | 0.000                 |                                         | 21.4                                        | 0.0                   | 0.0                   |                        | 0.2155                                               | 0.4647                | 0.3031                | 0.4647                | 0.3031              |  |
| <i>Lactobacillus vaginalis</i>                    | 0.049                              | 0.133                 | 0.055                 |                                         | 14.3                                        | 25.0                  | 18.2                  |                        | 0.3158                                               | 0.4053                | 0.3031                | 0.4053                | 0.3031              |  |
| <i>Anaeroglobus geminatus</i>                     | 0.105                              | 0.097                 | 0.000                 |                                         | 21.4                                        | 25.0                  | 0.0                   |                        | 0.3215                                               | 0.1966                | 0.3620                | 0.1966                | 0.3620              |  |
| <i>Mitsuokella</i> sp. HOT521                     | 0.237                              | 0.122                 | 0.288                 |                                         | 78.6                                        | 50.0                  | 72.7                  |                        | 0.3529                                               | 0.2570                | 0.3824                | 0.2570                | 0.3824              |  |
| <i>Mogibacterium diversum</i>                     | 0.354                              | 0.226                 | 0.316                 |                                         | 85.7                                        | 66.7                  | 72.7                  |                        | 0.4279                                               | 0.3405                | 0.4017                | 0.3405                | 0.4017              |  |
| <i>Mogibacterium neglectum</i>                    | 0.197                              | 0.092                 | 0.000                 |                                         | 42.9                                        | 16.7                  | 0.0                   |                        | 0.4201                                               | 0.5550                | 0.4198                | 0.5550                | 0.4198              |  |
| <i>Mogibacterium timidum</i>                      | 0.056                              | 0.000                 | 0.038                 |                                         | 14.3                                        | 0.0                   | 9.1                   |                        | 0.3947                                               | 0.3459                | 0.4182                | 0.3459                | 0.4182              |  |
| <i>Oribacterium sinus</i>                         | 0.363                              | 0.337                 | 0.464                 |                                         | 85.7                                        | 75.0                  | 90.9                  |                        | 0.4316                                               | 0.2319                | 0.3726                | 0.2319                | 0.3726              |  |
| <i>Parvimonas micra</i>                           | 0.224                              | 0.122                 | 0.147                 |                                         | 50.0                                        | 50.0                  | 63.6                  |                        | 0.4414                                               | 0.1777                | 0.1757                | 0.1777                | 0.1757              |  |
| <i>Parvimonas</i> sp. HOT110                      | 0.212                              | 0.000                 | 0.000                 | 0.001, 0.001                            | 50.0                                        | 0.0                   | 0.0                   | 0.001                  | 0.4279                                               | 0.4520                | 0.2236                | 0.4520                | 0.2236              |  |
| <i>Parvimonas</i> sp. HOT393                      | 0.363                              | 0.449                 | 0.220                 |                                         | 85.7                                        | 91.7                  | 81.8                  |                        | 0.3598                                               | 0.4423                | 0.2236                | 0.4423                | 0.2236              |  |
| <i>Peptioccocus</i> sp. HOT167                    | 0.166                              | 0.071                 | 0.000                 |                                         | 42.9                                        | 25.0                  | 0.0                   |                        | 0.3945                                               | 0.2900                | 0.0000                | 0.2900                | 0.0000              |  |
| <i>Peptostreptococcaceae</i> [1][G-2] sp. HOT091  | 0.218                              | 0.032                 | 0.000                 | 0.16, 0.006                             | 42.9                                        | 8.3                   | 0.0                   |                        | 0.3958                                               | 0.3883                | 0.2220                | 0.3883                | 0.2220              |  |
| <i>Peptostreptococcaceae</i> [1][G-4] sp. HOT369  | 0.306                              | 0.033                 | 0.040                 |                                         | 57.1                                        | 8.3                   | 18.2                  |                        | 0.2766                                               | 0.3932                | 0.2220                | 0.3932                | 0.2220              |  |
| <i>Peptostreptococcaceae</i> [1][G-7] sp. HOT081  | 0.008                              | 0.000                 | 0.000                 |                                         | 7.1                                         | 0.0                   | 0.0                   |                        | 0.3233                                               | 0.4331                | 0.7088                | 0.4331                | 0.7088              |  |
| <i>Peptostreptococcaceae</i> [13][G-2] sp. HOT790 | 0.303                              | 0.246                 | 0.347                 |                                         | 71.4                                        | 50.0                  | 54.5                  |                        | 0.4145                                               | 0.4331                | 0.7088                | 0.4331                | 0.7088              |  |
| <i>Peptostreptococcus stomatis</i>                | 0.165                              | 0.000                 | 0.000                 | 0.003, 0.003                            | 42.9                                        | 0.0                   | 0.0                   | 0.003                  | 0.4176                                               | 0.7795                | 0.3841                | 0.7795                | 0.3841              |  |
| <i>Pseudoramibacter alactolyticus</i>             |                                    |                       |                       |                                         |                                             |                       |                       |                        |                                                      |                       |                       |                       |                     |  |

(continued)

Appendix Table 2. (continued)

| Species/HOMD Taxon                    | Mean Species Prevalence, %         |                       |                                     |                                     | Proportion in Which Species Was Detected, % |                       |                                     |                        | Median Species Prevalence among Positive Subjects, % |                       |                                     |  |
|---------------------------------------|------------------------------------|-----------------------|-------------------------------------|-------------------------------------|---------------------------------------------|-----------------------|-------------------------------------|------------------------|------------------------------------------------------|-----------------------|-------------------------------------|--|
|                                       | Romania: High Prevalence of Caries |                       | Sweden: Caries Active / Caries Free |                                     | Romania: High Prevalence of Caries          |                       | Sweden: Caries Active / Caries Free |                        | Romania: High Prevalence of Caries                   |                       | Sweden: Caries Active / Caries Free |  |
|                                       | Romania: High Prevalence of Caries | Sweden: Caries Active | Sweden: Caries Free                 | P <sub>GROUP</sub> <sup>TREND</sup> | Romania: High Prevalence of Caries          | Sweden: Caries Active | Sweden: Caries Free                 | χ <sup>2</sup> P Value | Romania: High Prevalence of Caries                   | Sweden: Caries Active | Sweden: Caries Free                 |  |
| <i>Selenomonas artemidis</i>          | 0.059                              | 0.171                 | 0.140                               |                                     | 14.3                                        | 25.0                  | 36.4                                |                        | 0.4462                                               | 0.4647                | 0.3347                              |  |
| <i>Selenomonas infelix</i>            | 0.238                              | 0.291                 | 0.127                               |                                     | 57.1                                        | 66.7                  | 36.4                                |                        | 0.4561                                               | 0.3684                | 0.2738                              |  |
| <i>Selenomonas noxia</i>              | 0.326                              | 0.278                 | 0.279                               |                                     | 50.0                                        | 91.7                  | 90.9                                |                        | 0.4950                                               | 0.3630                | 0.3477                              |  |
| <i>Selenomonas</i> sp. HOT137         | 0.079                              | 0.099                 | 0.309                               |                                     | 21.4                                        | 25.0                  | 72.7                                |                        | 0.4411                                               | 0.3755                | 0.3477                              |  |
| <i>Selenomonas</i> sp. HOT138         | 0.063                              | 0.233                 | 0.141                               |                                     | 14.3                                        | 66.7                  | 36.4                                |                        | 0.4473                                               | 0.2333                | 0.4182                              |  |
| <i>Selenomonas</i> sp. HOT140         | 0.065                              | 0.039                 | 0.273                               |                                     | 7.1                                         | 16.7                  | 54.5                                |                        | 0.6034                                               | 0.1918                | 0.5507                              |  |
| <i>Selenomonas</i> sp. HOT892         | 0.021                              | 0.149                 | 0.244                               |                                     | 7.1                                         | 50.0                  | 36.4                                |                        | 0.3461                                               | 0.2751                | 0.5043                              |  |
| <i>Shuttleworthia satelles</i>        | 0.204                              | 0.143                 | 0.040                               |                                     | 50.0                                        | 25.0                  | 18.2                                |                        | 0.3972                                               | 0.4422                | 0.3276                              |  |
| <i>Streptococcus anginosus</i>        | 0.778                              | 0.655                 | 3.821                               |                                     | 85.7                                        | 91.7                  | 72.7                                |                        | 0.4024                                               | 0.3822                | 0.3371                              |  |
| <i>Streptococcus australis</i>        | 0.731                              | 0.305                 | 0.416                               |                                     | 100.0                                       | 66.7                  | 100.0                               | 0.009                  | 0.3332                                               | 0.4074                | 0.3496                              |  |
| <i>Streptococcus constellatus</i>     | 0.244                              | 0.493                 | 0.316                               |                                     | 64.3                                        | 83.3                  | 63.6                                |                        | 1.4529                                               | 0.8039                | 0.6885                              |  |
| <i>Streptococcus cristatus</i>        | 3.555                              | 2.100                 | 1.740                               |                                     | 100.0                                       | 100.0                 | 100.0                               |                        | 1.8749                                               | 1.4723                | 1.1984                              |  |
| <i>Streptococcus downei</i>           | 0.073                              | 0.000                 | 0.000                               |                                     | 21.4                                        | 0.0                   | 0.0                                 |                        | 0.5125                                               | 0.4597                | 0.6919                              |  |
| <i>Streptococcus gordanii</i>         | 1.470                              | 0.819                 | 1.007                               |                                     | 100.0                                       | 100.0                 | 90.9                                |                        | 0.5835                                               | 0.3796                | 0.3757                              |  |
| <i>Streptococcus infantis</i>         | 0.660                              | 0.478                 | 0.358                               |                                     | 92.9                                        | 100.0                 | 90.9                                |                        | 0.5277                                               | 0.3043                | 0.3486                              |  |
| <i>Streptococcus intermedius</i>      | 0.526                              | 0.588                 | 0.614                               |                                     | 100.0                                       | 100.0                 | 90.9                                |                        | 0.8952                                               | 0.7825                | 1.1283                              |  |
| <i>Streptococcus mitis</i>            | 8.165                              | 4.718                 | 2.462                               |                                     | 100.0                                       | 100.0                 | 100.0                               |                        | 4.4181                                               | 1.3776                | 2.1076                              |  |
| <i>Streptococcus mitis</i> bv2        | 4.425                              | 1.577                 | 3.988                               | 0.005, 0.155                        | 100.0                                       | 100.0                 | 100.0                               |                        | 2.6362                                               | 0.5770                | 1.9683                              |  |
| <i>Streptococcus mutans</i>           | 1.381                              | 0.588                 | 0.894                               |                                     | 85.7                                        | 83.3                  | 45.5                                |                        | 0.4379                                               | 0.2303                | 0.3726                              |  |
| <i>Streptococcus oligofermentans</i>  | 0.264                              | 0.036                 | 0.121                               |                                     | 42.9                                        | 16.7                  | 18.2                                |                        | 0.4447                                               | 0.3397                | 0.2640                              |  |
| <i>Streptococcus oralis</i>           | 0.601                              | 0.635                 | 0.293                               |                                     | 85.7                                        | 91.7                  | 81.8                                |                        | 0.4512                                               | 0.3397                | 0.1826                              |  |
| <i>Streptococcus parasanguinis</i> I  | 0.213                              | 0.183                 | 0.093                               |                                     | 50.0                                        | 50.0                  | 36.4                                |                        | 0.3765                                               | 0.2625                | 0.3583                              |  |
| <i>Streptococcus parasanguinis</i> II | 0.384                              | 0.293                 | 0.362                               |                                     | 57.1                                        | 75.0                  | 54.5                                |                        | 0.3765                                               | 0.3430                | 0.4354                              |  |
| <i>Streptococcus peroris</i>          | 0.223                              | 0.050                 | 0.070                               |                                     | 64.3                                        | 16.7                  | 18.2                                |                        | 0.3617                                               | 0.4003                | 0.3440                              |  |
| <i>Streptococcus pneumoniae</i>       | 0.422                              | 0.193                 | 0.260                               |                                     | 92.9                                        | 50.0                  | 63.6                                |                        | 0.3599                                               | 0.3825                | 0.4577                              |  |
| <i>Streptococcus salivarius</i>       | 1.833                              | 0.347                 | 0.755                               |                                     | 100.0                                       | 83.3                  | 90.9                                |                        | 0.9542                                               | 0.6430                | 0.7453                              |  |
| <i>Streptococcus sanguinis</i>        | 2.779                              | 1.539                 | 1.423                               |                                     | 100.0                                       | 100.0                 | 100.0                               |                        | 1.8116                                               | 0.8878                | 0.9745                              |  |
| <i>Streptococcus sinensis</i>         | 0.245                              | 0.042                 | 0.087                               |                                     | 42.9                                        | 16.7                  | 9.1                                 |                        | 0.5264                                               | 0.3932                | 0.9540                              |  |
| <i>Streptococcus sobrinus</i>         | 0.538                              | 0.039                 | 0.000                               | 0.014, 0.005                        | 42.9                                        | 8.3                   | 0.0                                 |                        | 0.4800                                               | 0.3651                | 0.3556                              |  |
| <i>Streptococcus</i> sp. HOT055       | 0.111                              | 0.042                 | 0.102                               |                                     | 21.4                                        | 16.7                  | 27.3                                |                        | 0.2983                                               | 0.3635                | 0.3714                              |  |
| <i>Streptococcus</i> sp. HOT056       | 0.345                              | 0.402                 | 0.266                               |                                     | 100.0                                       | 91.7                  | 54.5                                | 0.006                  | 0.2983                                               | 0.5389                | 0.3714                              |  |
| <i>Streptococcus</i> sp. HOT057       | 0.198                              | 0.150                 | 0.133                               |                                     | 35.7                                        | 16.7                  | 45.5                                |                        | 0.8136                                               | 0.4630                | 0.4594                              |  |
| <i>Streptococcus</i> sp. HOT058       | 1.487                              | 1.114                 | 1.426                               |                                     | 100.0                                       | 100.0                 | 100.0                               |                        | 0.6429                                               | 0.4586                | 0.5389                              |  |
| <i>Streptococcus</i> sp. HOT061       | 0.526                              | 0.229                 | 0.097                               |                                     | 57.1                                        | 41.7                  | 27.3                                |                        | 0.3568                                               | 0.4074                | 0.1933                              |  |
| <i>Streptococcus</i> sp. HOT066       | 0.274                              | 0.243                 | 0.126                               |                                     | 71.4                                        | 58.3                  | 36.4                                |                        | 0.3509                                               | 0.3755                | 0.1933                              |  |
| <i>Streptococcus</i> sp. HOT067       | 0.061                              | 0.000                 | 0.031                               |                                     | 14.3                                        | 0.0                   | 9.1                                 |                        | 0.3352                                               | 0.4050                | 0.3448                              |  |
| <i>Streptococcus</i> sp. HOT068       | 0.048                              | 0.121                 | 0.063                               |                                     | 14.3                                        | 33.3                  | 18.2                                |                        | 0.4116                                               | 0.3684                | 0.6424                              |  |
| <i>Streptococcus</i> sp. HOT069       | 0.223                              | 0.010                 | 0.172                               |                                     | 42.9                                        | 8.3                   | 18.2                                |                        | 0.4473                                               | 0.3380                | 0.3866                              |  |
| <i>Streptococcus</i> sp. HOT070       | 0.750                              | 0.453                 | 0.291                               |                                     | 92.9                                        | 66.7                  | 81.8                                |                        | 0.4411                                               | 0.4335                | 0.4168                              |  |
| <i>Streptococcus</i> sp. HOT071       | 1.881                              | 1.149                 | 3.602                               |                                     | 85.7                                        | 91.7                  | 90.9                                |                        | 0.3888                                               | 0.4331                | 1.0980                              |  |
| <i>Streptococcus</i> sp. HOT074       | 0.233                              | 0.088                 | 0.000                               | 0.010, 0.002                        | 57.1                                        | 25.0                  | 0.0                                 | 0.007                  | 0.3397                                               | 0.3811                | 0.3514                              |  |
| <i>Streptococcus</i> sp. HOT431       | 0.392                              | 0.232                 | 0.258                               |                                     | 100.0                                       | 66.7                  | 63.6                                |                        | 0.3158                                               | 0.3703                | 0.3786                              |  |
| <i>Streptococcus vestibularis</i>     | 0.137                              | 0.831                 | 0.421                               | 0.009, 0.003                        | 50.0                                        | 83.3                  | 100.0                               |                        | 0.2842                                               | 0.3844                | 0.3786                              |  |
| <i>Veillonella atypica</i>            | 0.134                              | 0.069                 | 0.122                               |                                     | 35.7                                        | 16.7                  | 27.3                                |                        | 0.2755                                               | 0.3755                | 0.3442                              |  |
| <i>Veillonella dispar</i>             | 0.295                              | 0.323                 | 0.406                               |                                     | 92.9                                        | 91.7                  | 100.0                               |                        | 0.2983                                               | 0.3684                | 0.4016                              |  |

(continued)



Appendix Table 2. (continued)

| Species/HOMD Taxon                                       | Mean Species Prevalence, %         |                       |                       |                    | Proportion in Which Species Was Detected, % |                      |                       |                     | Median Species Prevalence among Positive Subjects, % |         |                       |                       |                     |                     |
|----------------------------------------------------------|------------------------------------|-----------------------|-----------------------|--------------------|---------------------------------------------|----------------------|-----------------------|---------------------|------------------------------------------------------|---------|-----------------------|-----------------------|---------------------|---------------------|
|                                                          | Romania: High Prevalence of Caries |                       | Sweden: Caries Active |                    | Romania: High Prevalence of Caries          |                      | Sweden: Caries Active |                     | Romania: High Prevalence of Caries                   |         | Sweden: Caries Active |                       | Sweden: Caries Free |                     |
|                                                          | Prevalence of Caries               | Sweden: Caries Active | Sweden: Caries Free   | $P_{\text{GROUP}}$ | $P_{\text{TREND}}$                          | Prevalence of Caries | Sweden: Caries Active | Sweden: Caries Free | $\chi^2$                                             | P Value | Prevalence of Caries  | Sweden: Caries Active | Sweden: Caries Free | Sweden: Caries Free |
| <i>Veillonella parvula</i>                               | 0.397                              | 0.416                 | 0.452                 |                    |                                             | 100.0                | 100.0                 | 100.0               |                                                      |         | 0.5909                | 0.8109                | 0.6462              |                     |
| <i>Fusobacterium nucleatum</i> subsp. <i>polymorphum</i> | 1.466                              | 2.841                 | 2.288                 |                    |                                             | 100.0                | 100.0                 | 100.0               |                                                      |         | 0.7830                | 1.6503                | 1.0769              |                     |
| <i>F. nucleatum</i> subsp. <i>vincentii</i>              | 0.432                              | 1.872                 | 1.219                 | 0.006, 0.024       |                                             | 100.0                | 100.0                 | 100.0               |                                                      |         | 0.4599                | 1.3908                | 0.8829              |                     |
| <i>F. nucleatum</i> subsp. <i>animalis</i>               | 0.685                              | 2.018                 | 1.995                 |                    |                                             | 100.0                | 100.0                 | 100.0               |                                                      |         | 0.4757                | 0.8226                | 0.3783              |                     |
| <i>F. nucleatum</i> subsp. <i>nucleatum</i>              | 0.333                              | 0.307                 | 0.207                 |                    |                                             | 71.4                 | 83.3                  | 72.7                |                                                      |         | 0.4582                | 0.2711                | 0.3570              |                     |
| <i>Fusobacterium periodonticum</i>                       | 1.409                              | 0.404                 | 0.390                 |                    |                                             | 92.9                 | 91.7                  | 90.9                |                                                      |         | 0.4512                | 0.3420                | 0.3787              |                     |
| <i>Fusobacterium</i> sp. HOT203                          | 0.314                              | 0.351                 | 0.200                 |                    |                                             | 71.4                 | 83.3                  | 54.5                |                                                      |         | 0.4473                | 0.3932                | 0.3514              |                     |
| <i>Fusobacterium</i> sp. HOT205                          | 0.084                              | 0.104                 | 0.126                 |                    |                                             | 21.4                 | 25.0                  | 27.3                |                                                      |         | 1.2716                | 0.9432                | 0.5419              |                     |
| <i>Leptotrichia buccalis</i>                             | 1.468                              | 2.995                 | 0.808                 |                    |                                             | 100.0                | 100.0                 | 81.8                |                                                      |         | 0.4932                | 0.5451                | 0.3755              |                     |
| <i>Leptotrichia goodfellowii</i>                         | 0.212                              | 0.196                 | 0.253                 |                    |                                             | 71.4                 | 75.0                  | 81.8                |                                                      |         | 0.4932                | 0.5551                | 0.2761              |                     |
| <i>Leptotrichia hofstadii</i>                            | 1.977                              | 2.895                 | 2.126                 |                    |                                             | 92.9                 | 91.7                  | 100.0               |                                                      |         | 1.0191                | 1.3579                | 1.3236              |                     |
| <i>Leptotrichia hongkongensis</i>                        | 1.013                              | 1.557                 | 1.688                 |                    |                                             | 92.9                 | 100.0                 | 100.0               |                                                      |         | 0.6294                | 0.6725                | 0.6848              |                     |
| <i>Leptotrichia strahii</i>                              | 0.660                              | 0.462                 | 0.355                 |                    |                                             | 92.9                 | 66.7                  | 72.7                |                                                      |         | 0.6147                | 0.4826                | 0.3725              |                     |
| <i>Leptotrichia</i> sp. HOT212                           | 0.594                              | 0.512                 | 0.833                 |                    |                                             | 92.9                 | 100.0                 | 100.0               |                                                      |         | 0.3744                | 0.3555                | 0.3490              |                     |
| <i>Leptotrichia</i> sp. HOT215                           | 0.368                              | 0.303                 | 0.514                 |                    |                                             | 85.7                 | 83.3                  | 100.0               |                                                      |         | 0.3685                | 0.3162                | 0.3480              |                     |
| <i>Leptotrichia</i> sp. HOT217                           | 0.222                              | 0.161                 | 0.201                 |                    |                                             | 57.1                 | 41.7                  | 45.5                |                                                      |         | 0.4581                | 0.3140                | 0.3180              |                     |
| <i>Leptotrichia</i> sp. HOT218                           | 0.315                              | 0.016                 | 0.057                 |                    |                                             | 42.9                 | 8.3                   | 18.2                |                                                      |         | 0.4313                | 0.4326                | 0.2623              |                     |
| <i>Leptotrichia</i> sp. HOT219                           | 0.221                              | 0.308                 | 0.142                 |                    |                                             | 57.1                 | 66.7                  | 54.5                |                                                      |         | 0.3139                | 0.4647                | 0.3138              |                     |
| <i>Leptotrichia</i> sp. HOT221                           | 0.180                              | 0.192                 | 0.239                 |                    |                                             | 57.1                 | 41.7                  | 54.5                |                                                      |         | 0.3332                | 0.5834                | 0.4166              |                     |
| <i>Leptotrichia</i> sp. HOT223                           | 0.296                              | 0.686                 | 0.854                 |                    |                                             | 64.3                 | 75.0                  | 81.8                |                                                      |         | 0.4141                | 0.4328                | 0.4667              |                     |
| <i>Leptotrichia</i> sp. HOT225                           | 1.309                              | 0.896                 | 1.087                 |                    |                                             | 100.0                | 83.3                  | 100.0               |                                                      |         | 0.4216                | 0.4113                | 0.5293              |                     |
| <i>Leptotrichia</i> sp. HOT392                           | 0.456                              | 0.513                 | 0.478                 |                    |                                             | 100.0                | 83.3                  | 81.8                |                                                      |         | 0.4946                | 0.5539                | 0.7579              |                     |
| <i>Leptotrichia</i> sp. HOT417                           | 1.391                              | 0.680                 | 0.872                 |                    |                                             | 100.0                | 91.7                  | 90.9                |                                                      | 0.005   | 0.4932                | 0.5028                | 0.7879              |                     |
| <i>Leptotrichia</i> sp. HOT463                           | 0.427                              | 0.032                 | 0.120                 |                    |                                             | 64.3                 | 8.3                   | 18.2                |                                                      |         | 0.4387                | 0.3834                | 0.6360              |                     |
| <i>Leptotrichia</i> sp. HOT498                           | 1.617                              | 0.887                 | 1.061                 |                    |                                             | 92.9                 | 66.7                  | 45.5                |                                                      |         | 0.4932                | 0.6199                | 0.3615              |                     |
| <i>Leptotrichia</i> sp. HOT847                           | 0.376                              | 0.052                 | 0.000                 | <0.001, <0.001     |                                             | 71.4                 | 8.3                   | 0.0                 |                                                      |         | 0.4561                | 0.3737                | 0.5699              |                     |
| <i>Leptotrichia</i> sp. HOT847                           | 0.349                              | 0.269                 | 0.414                 |                    |                                             | 78.6                 | 58.3                  | 72.7                |                                                      |         | 0.2844                | 0.3932                | 0.3975              |                     |
| <i>Leptotrichia</i> sp. HOT879                           | 0.225                              | 0.326                 | 0.144                 |                    |                                             | 78.6                 | 50.0                  | 36.4                |                                                      |         | 0.3544                | 0.9294                | 0.6890              |                     |
| <i>Leptotrichia</i> sp. HOT909                           | 1.881                              | 2.846                 | 3.403                 |                    |                                             | 92.9                 | 91.7                  | 81.8                |                                                      |         | 0.4766                | 0.5506                | 0.4102              |                     |
| <i>Campylobacter concisus</i>                            | 0.362                              | 0.376                 | 0.340                 |                    |                                             | 92.9                 | 91.7                  | 100.0               |                                                      |         | 0.3879                | 0.5613                | 0.6317              |                     |
| <i>Campylobacter gracilis</i>                            | 0.419                              | 1.062                 | 1.516                 |                    |                                             | 100.0                | 100.0                 | 100.0               |                                                      |         | 0.3556                | 0.7810                | 0.8717              |                     |
| <i>Campylobacter rectus</i>                              | 0.257                              | 0.150                 | 0.121                 |                    |                                             | 57.1                 | 33.3                  | 36.4                |                                                      |         | 0.4279                | 0.3731                | 0.3786              |                     |
| <i>Campylobacter showae</i>                              | 0.096                              | 0.605                 | 0.440                 |                    |                                             | 92.9                 | 100.0                 | 90.9                |                                                      |         | 0.2779                | 0.3130                | 0.4261              |                     |
| <i>Desulfobulbus</i> sp. HOT041                          | 0.339                              | 0.397                 | 0.420                 |                    |                                             | 28.6                 | 0.0                   | 0.0                 |                                                      |         | 0.2555                | 0.3065                | 0.3445              |                     |
| <i>Eikenella corrodens</i>                               | 0.294                              | 0.071                 | 0.265                 |                    |                                             | 100.0                | 100.0                 | 100.0               |                                                      |         | 0.3233                | 0.3065                | 0.4150              |                     |
| <i>Kingella denitrificans</i>                            | 0.238                              | 0.399                 | 0.384                 |                    |                                             | 64.3                 | 16.7                  | 45.5                |                                                      |         | 0.2464                | 0.3388                | 0.4238              |                     |
| <i>Kingella oralis</i>                                   | 0.133                              | 0.094                 | 0.193                 |                    |                                             | 85.7                 | 100.0                 | 100.0               |                                                      |         | 0.2657                | 0.3388                | 0.2584              |                     |
| <i>Kingella</i> sp. HOT012                               | 0.017                              | 0.000                 | 0.000                 |                    |                                             | 28.6                 | 16.7                  | 45.5                |                                                      |         | 0.2945                | 0.5628                | 0.2411              |                     |
| <i>Neisseria</i> sp. HOT523                              | 0.623                              | 0.676                 | 0.564                 |                    |                                             | 71.4                 | 0.0                   | 0.0                 |                                                      |         | 0.4594                | 0.3963                | 0.4899              |                     |
| <i>Lautropia mirabilis</i>                               | 0.033                              | 0.204                 | 0.204                 |                    |                                             | 92.9                 | 91.7                  | 90.9                |                                                      |         | 0.4520                | 0.4732                | 0.5438              |                     |
| <i>Neisseria bacilliformis</i>                           | 0.368                              | 0.344                 | 0.197                 |                    |                                             | 14.3                 | 41.7                  | 36.4                |                                                      |         | 0.2932                | 0.3932                | 0.2904              |                     |
| <i>Neisseria elongata</i>                                | 0.331                              | 0.138                 | 0.160                 |                    |                                             | 85.7                 | 83.3                  | 72.7                |                                                      |         | 0.3353                | 0.3755                | 0.1933              |                     |
| <i>Neisseria flavas</i>                                  | 0.525                              | 0.126                 | 0.115                 |                    |                                             | 78.6                 | 41.7                  | 45.5                |                                                      |         | 0.3765                | 0.3789                | 0.3445              |                     |
| <i>Neisseria flavescens</i>                              | 0.193                              | 0.030                 | 0.000                 | 0.014, 0.005       |                                             | 71.4                 | 25.0                  | 36.4                |                                                      |         | 0.4844                | 0.3737                | 0.3656              |                     |
| <i>Neisseria meningitidis</i>                            |                                    |                       |                       |                    |                                             | 42.9                 | 8.3                   | 0.0                 |                                                      |         | 0.5393                | 0.5740                | 0.3831              |                     |

(continued)

Appendix Table 2. (continued)

| Species/HOMD Taxon                | Mean Species Prevalence, %         |       |                     |              | Proportion in Which Species Was Detected, % |      |                     |       | Median Species Prevalence among Positive Subjects, % |        |                     |        |
|-----------------------------------|------------------------------------|-------|---------------------|--------------|---------------------------------------------|------|---------------------|-------|------------------------------------------------------|--------|---------------------|--------|
|                                   | Romania: High Prevalence of Caries |       | Sweden: Caries Free |              | Romania: High Prevalence of Caries          |      | Sweden: Caries Free |       | Romania: High Prevalence of Caries                   |        | Sweden: Caries Free |        |
|                                   | 0.395                              | 0.065 | 0.070               | 0.006, 0.008 | 64.3                                        | 8.3  | 18.2                | 0.005 | 0.5391                                               | 0.3822 | 0.3180              | 0.3613 |
| <i>Neisseria oralis</i>           | 0.315                              | 0.126 | 0.140               | 0.006, 0.008 | 64.3                                        | 33.3 | 45.5                | 0.005 | 0.5659                                               | 0.4326 | 0.3726              | 0.3613 |
| <i>Neisseria pharyngis</i>        | 4.147                              | 0.513 | 0.211               | 0.013, 0.005 | 78.6                                        | 75.0 | 36.4                |       | 0.6617                                               | 0.4517 | 0.4357              | 0.4357 |
| <i>Neisseria sicca</i>            | 0.259                              | 0.108 | 0.076               |              | 42.9                                        | 16.7 | 18.2                |       | 0.4561                                               | 0.4234 | 0.3600              | 0.3600 |
| <i>Neisseria</i> sp. HOT015       | 0.373                              | 0.187 | 0.256               |              | 64.3                                        | 50.0 | 54.5                |       | 0.3896                                               | 0.3583 | 0.3257              | 0.3257 |
| <i>Neisseria</i> sp. HOT016       | 0.110                              | 0.000 | 0.041               |              | 28.6                                        | 0.0  | 18.2                |       | 0.4932                                               | 0.0000 | 0.2281              | 0.2281 |
| <i>Neisseria</i> sp. HOT018       | 0.088                              | 0.000 | 0.000               |              | 21.4                                        | 0.0  | 0.0                 |       | 0.2945                                               | 0.2520 | 0.3613              | 0.3613 |
| <i>Neisseria</i> sp. HOT020       | 0.271                              | 0.090 | 0.309               |              | 71.4                                        | 33.3 | 63.6                |       | 0.2979                                               | 0.3461 | 0.3890              | 0.3890 |
| <i>Neisseria subflava</i>         | 0.145                              | 0.187 | 0.193               |              | 35.7                                        | 41.7 | 45.5                |       | 0.4279                                               | 0.3834 | 0.3445              | 0.3445 |
| <i>Otawia</i> sp. HOT894          | 0.156                              | 0.239 | 0.041               |              | 42.9                                        | 50.0 | 18.2                |       | 0.4376                                               | 0.3651 | 0.1118              | 0.1118 |
| <i>Treponema denticola</i>        | 0.422                              | 0.411 | 0.010               |              | 28.6                                        | 33.3 | 9.1                 |       | 0.4561                                               | 0.3898 | 0.2480              | 0.2480 |
| <i>Treponema lectithiolyticum</i> | 0.186                              | 0.016 | 0.087               |              | 78.6                                        | 75.0 | 54.5                |       | 0.4537                                               | 0.4837 | 0.6776              | 0.6776 |
| <i>Treponema maltophilum</i>      | 0.440                              | 0.754 | 0.589               |              | 35.7                                        | 8.3  | 9.1                 |       | 0.4279                                               | 0.4469 | 0.4965              | 0.4965 |
| <i>Treponema socranskii</i>       | 0.125                              | 0.063 | 0.014               |              | 100.0                                       | 91.7 | 100.0               |       | 0.2945                                               | 0.3932 | 0.4029              | 0.4029 |
| <i>Treponema</i> sp. HOT226       | 0.179                              | 0.082 | 0.000               |              | 21.4                                        | 16.7 | 9.1                 |       | 0.5388                                               | 0.3576 | 0.1495              | 0.1495 |
| <i>Treponema</i> sp. HOT262       | 0.238                              | 0.121 | 0.186               |              | 35.7                                        | 25.0 | 0.0                 |       | 0.4540                                               | 0.1573 | 0.4301              | 0.4301 |
| <i>Treponema</i> sp. HOT268       | 0.133                              | 0.272 | 0.121               |              | 50.0                                        | 33.3 | 36.4                |       | 0.4561                                               | 0.2361 | 0.3440              | 0.3440 |
| SR1 [G-1] sp. HOT345              | 0.060                              | 0.030 | 0.000               |              | 28.6                                        | 58.3 | 27.3                |       | 0.4747                                               | 0.3946 | 0.3440              | 0.3440 |
| <i>Mycoplasma faucium</i>         | 0.082                              | 0.302 | 0.164               |              | 14.3                                        | 8.3  | 0.0                 |       | 0.3973                                               | 0.4286 | 0.2838              | 0.2838 |
| <i>Mycoplasma salivarium</i>      | 0.245                              | 0.392 | 0.310               |              | 28.6                                        | 58.3 | 45.5                |       | 0.3689                                               | 0.4041 | 0.2918              | 0.2918 |
| TM7 [G-1] sp. HOT346              | 0.101                              | 0.177 | 0.204               |              | 64.3                                        | 91.7 | 81.8                |       | 0.3689                                               | 0.4326 | 0.3180              | 0.3180 |
| TM7 [G-1] sp. HOT347              | 0.189                              | 0.202 | 0.323               |              | 28.6                                        | 33.3 | 36.4                |       | 0.2288                                               | 0.3651 | 0.3312              | 0.3312 |
| TM7 [G-1] sp. HOT348              | 0.254                              | 0.178 | 0.237               |              | 64.3                                        | 58.3 | 90.9                |       | 0.2120                                               | 0.3195 | 0.3445              | 0.3445 |
| TM7 [G-1] sp. HOT349              | 0.083                              | 0.115 | 0.038               |              | 50.0                                        | 41.7 | 45.5                |       | 0.4512                                               | 0.3195 | 0.5038              | 0.5038 |
| TM7 [G-2] sp. HOT350              | 0.330                              | 0.152 | 0.128               |              | 21.4                                        | 25.0 | 9.1                 |       | 0.4537                                               | 0.5247 | 0.3906              | 0.3906 |
| TM7 [G-5] sp. HOT437              |                                    |       |                     |              | 64.3                                        | 25.0 | 27.3                |       | 0.4561                                               | 0.7744 | 0.3613              | 0.3613 |

Data are presented as mean species prevalence (% of all sequences) and percentage of detection frequencies by caries group (Romanian group with high prevalence of caries and Swedish caries-active and caries-free groups) and as median values among those in whom the species/phylogroup was detected (see Statistics section). Differences between group means and prevalences were tested with the Kruskal-Wallis test and for trend by increasing caries presence with the Jonckheere test.  $P \leq 0.008$  is considered statistically significant.

**Appendix Table 3.** Core Microbiome.

| Phylum                        | Genus                 | Species/HOMD Taxon               | Found in 100% of Subjects                  | Found in 90% of Subjects  |     |     |
|-------------------------------|-----------------------|----------------------------------|--------------------------------------------|---------------------------|-----|-----|
| Actinobacteria                | Actinobaculum         | Actinobaculum sp. HOT183         |                                            | Yes                       |     |     |
|                               |                       | Actinomyces                      | Actinomyces gerencseriae                   | Yes                       | Yes |     |
|                               |                       |                                  | Actinomyces naeslundii                     | Yes                       | Yes |     |
|                               |                       |                                  | Actinomyces oris                           | Yes                       | Yes |     |
|                               |                       |                                  | Actinomyces sp. HOT170                     | Yes                       | Yes |     |
|                               |                       |                                  | Actinomyces sp. HOT175                     | Yes                       | Yes |     |
|                               |                       |                                  | Actinomyces johnsonii                      |                           | Yes |     |
|                               |                       |                                  | Actinomyces sp. HOT169                     |                           | Yes |     |
|                               |                       |                                  | Actinomyces sp. HOT171                     |                           | Yes |     |
|                               |                       |                                  | Actinomyces sp. HOT180                     |                           | Yes |     |
|                               |                       |                                  | Actinomyces sp. HOT848                     |                           | Yes |     |
|                               |                       |                                  | Actinomyces sp. HOT877                     |                           | Yes |     |
|                               |                       | Corynebacterium                  | Corynebacterium matruchotii                | Yes                       | Yes |     |
|                               |                       |                                  | Corynebacterium durum                      |                           | Yes |     |
| Bacteroidetes                 | Rothia                | Rothia aeria                     |                                            | Yes                       |     |     |
|                               | Alloprevotella        | Alloprevotella tanneriae         | Yes                                        | Yes                       |     |     |
|                               | Bergeyella            | Bergeyella sp. HOT322            |                                            | Yes                       |     |     |
|                               | Capnocytophaga        | Capnocytophaga granulosa         | Capnocytophaga gingivalis                  | Yes                       | Yes |     |
|                               |                       | Capnocytophaga leadbetteri       | Capnocytophaga sp. HOT326                  |                           | Yes |     |
|                               |                       | Capnocytophaga sp. HOT864        | Capnocytophaga sputigena                   |                           | Yes |     |
|                               |                       | Porphyromonas                    | Porphyromonas catoniae                     |                           | Yes |     |
|                               |                       |                                  | Porphyromonas sp. HOT279                   |                           | Yes |     |
|                               |                       | Prevotella                       | Prevotella melaninogenica                  | Prevotella oris           | Yes | Yes |
|                               |                       |                                  | Prevotella sp. HOT317                      | Prevotella denticola      | Yes | Yes |
|                               |                       |                                  | Prevotella maculosa                        | Prevotella nigrescens     |     | Yes |
|                               |                       |                                  | Prevotella oulorum                         | Prevotella saccharolytica |     | Yes |
|                               |                       |                                  | Prevotella sp. HOT292                      | Tannerella                |     | Yes |
|                               | Tannerella            |                                  | Tannerella sp. HOT286                      |                           | Yes |     |
|                               | Catonella             |                                  | Catonella morbi                            |                           | Yes |     |
|                               | Dialister             |                                  | Dialister invisus                          |                           | Yes |     |
|                               | Eubacterium [11][G-7] |                                  | Eubacterium [11][G-7] yurii                |                           | Yes |     |
|                               | Firmicutes            | Gemella                          | Gemella haemolysans                        |                           | Yes |     |
|                               |                       |                                  | Gemella morbillorum                        |                           | Yes |     |
| Granulicatella                |                       | Granulicatella adiacens          | Yes                                        | Yes                       |     |     |
| Kongella                      |                       | Kingella oralis                  |                                            | Yes                       |     |     |
| Lachnoanaerobaculum           |                       | Lachnoanaerobaculum saburreum    | Yes                                        | Yes                       |     |     |
|                               |                       | Lachnoanaerobaculum umeaense     |                                            | Yes                       |     |     |
| Lachnospiraceae [G-3]         |                       | Lachnospiraceae [G-3] sp. HOT100 | Streptococcus cristatus                    | Yes                       | Yes |     |
|                               |                       | Streptococcus                    | Streptococcus mitis                        | Yes                       | Yes |     |
|                               |                       | Streptococcus mitis bv2          | Streptococcus sanguinis                    | Yes                       | Yes |     |
|                               |                       | Streptococcus sp. HOT58          | Streptococcus australis                    | Yes                       | Yes |     |
|                               |                       | Streptococcus gordonii           | Streptococcus infantis                     |                           | Yes |     |
|                               |                       | Streptococcus intermedius        | Streptococcus salivarius                   |                           | Yes |     |
|                               |                       | Streptococcus sp. HOT071         | Streptococcus sp. HOT071                   |                           | Yes |     |
|                               | Veillonella           | Veillonella parvula              | Yes                                        | Yes                       |     |     |
|                               |                       | Veillonella dispar               |                                            | Yes                       |     |     |
|                               | Fusobacteria          | Fusobacterium                    | Fusobacterium nucleatum subsp. polymorphum | Yes                       | Yes |     |
| F. nucleatum subsp. vincentii |                       |                                  | Yes                                        | Yes                       |     |     |
| F. nucleatum subsp. animalis  |                       |                                  | Yes                                        | Yes                       |     |     |

(continued)

Appendix Table 3. (continued)

| Phylum         | Genus                | Species/HOMD Taxon                                | Found in 100% of Subjects  | Found in 90% of Subjects |     |
|----------------|----------------------|---------------------------------------------------|----------------------------|--------------------------|-----|
|                | <i>Leptotrichia</i>  | <i>Fusobacterium periodonticum</i>                |                            | Yes                      |     |
|                |                      | <i>Leptotrichia buccalis</i>                      |                            | Yes                      |     |
|                |                      | <i>Leptotrichia hofstadii</i>                     |                            | Yes                      |     |
|                |                      | <i>Leptotrichia hongkongensis</i>                 |                            | Yes                      |     |
|                |                      | <i>Leptotrichia</i> sp. HOT212                    |                            | Yes                      |     |
|                |                      | <i>Leptotrichia</i> sp. HOT215                    |                            | Yes                      |     |
|                |                      | <i>Leptotrichia</i> sp. HOT225                    |                            | Yes                      |     |
|                |                      | <i>Leptotrichia</i> sp. HOT392                    |                            | Yes                      |     |
|                |                      | <i>Leptotrichia</i> sp. HOT417                    |                            | Yes                      |     |
|                |                      | <i>Leptotrichia wadei</i>                         |                            | Yes                      |     |
| Proteobacteria | <i>Campylobacter</i> | <i>Campylobacter gracilis</i>                     | Yes                        | Yes                      |     |
|                |                      | <i>Campylobacter concisus</i>                     |                            | Yes                      |     |
|                |                      | <i>Campylobacter showae</i>                       |                            | Yes                      |     |
|                |                      | <i>Eikenella</i>                                  | <i>Eikenella corrodens</i> | Yes                      | Yes |
|                |                      | <i>Kingella</i>                                   | <i>Kingella oralis</i>     |                          | Yes |
|                | <i>Lautropia</i>     | <i>Lautropia mirabilis</i>                        |                            | Yes                      |     |
| Spirochaetes   | <i>Treponema</i>     | <i>Treponema socranskii</i> subsp. <i>buccale</i> |                            | Yes                      |     |

Species/phylogenotypes shared by 100% (24 species) and by 90% (78 species) of the 37 adolescents with pyrosequencing information.

Appendix Table 4. Species/Phylogenotypes Associated with the 3 Caries Groups.

|                                                        | VIP Value                          |                                             |
|--------------------------------------------------------|------------------------------------|---------------------------------------------|
|                                                        | Romania: High Prevalence of Caries | Sweden: Caries Active / Sweden: Caries Free |
| Species associated with the Romanian high caries group |                                    |                                             |
| <i>Streptococcus sobrinus</i> by PCR                   | 1.88                               |                                             |
| <i>Streptococcus mutans</i> by PCR                     | 1.23                               |                                             |
| <i>S. sobrinus</i> by qPCR                             | 1.31                               |                                             |
| <i>Abiotrophia defectiva</i>                           | 1.40                               |                                             |
| <i>Alloprevotella</i> sp. HOT473                       | 1.34                               |                                             |
| <i>Alloprevotella</i> sp. HOT914                       | 1.21                               |                                             |
| <i>Catonella</i> sp. HOT164                            | 1.15                               |                                             |
| <i>Fusobacterium periodonticum</i>                     | 1.16                               |                                             |
| <i>Granulicatella elegans</i>                          | 1.57                               |                                             |
| <i>Lachnospiraceae</i> [G-2] sp. HOT096                | 1.14                               |                                             |
| <i>Lactobacillus vaginalis</i>                         | 1.01                               |                                             |
| <i>Leptotrichia</i> sp. HOT218                         | 1.27                               |                                             |
| <i>Leptotrichia</i> sp. HOT463                         | 1.16                               |                                             |
| <i>Leptotrichia</i> sp. HOT909                         | 1.39                               |                                             |
| <i>Neisseria flavescens</i>                            | 1.09                               |                                             |
| <i>Neisseria pharynges</i>                             | 1.24                               |                                             |
| <i>Neisseria sicca</i>                                 | 1.04                               |                                             |
| <i>Parvimonas</i> sp. HOT393                           | 1.22                               |                                             |
| <i>Peptostreptococcaceae</i> [I1][G-4] sp. HOT369      | 1.01                               |                                             |
| <i>Peptostreptococcus stomatis</i>                     | 1.18                               |                                             |
| <i>Porphyromonas</i> sp. HOT275                        | 1.12                               |                                             |
| <i>Porphyromonas</i> sp. HOT277                        | 1.02                               |                                             |
| <i>Porphyromonas</i> sp. HOT278                        | 1.02                               |                                             |
| <i>Prevotella dentalis</i>                             | 1.07                               |                                             |
| <i>Prevotella multiformis</i>                          | 1.06                               |                                             |
| <i>Shuttleworthia satelles</i>                         | 1.13                               |                                             |
| <i>Streptococcus australis</i>                         | 1.23                               |                                             |
| <i>Streptococcus cristatus</i>                         | 1.30                               |                                             |
| <i>Streptococcus sanguinis</i>                         | 1.25                               |                                             |
| <i>Streptococcus sinensis</i>                          | 1.07                               |                                             |
| <i>S. sobrinus</i>                                     | 1.19                               |                                             |

(continued)

Appendix Table 4. (continued)

|                                                                                           | VIP Value                          |                       |                     |
|-------------------------------------------------------------------------------------------|------------------------------------|-----------------------|---------------------|
|                                                                                           | Romania: High Prevalence of Caries | Sweden: Caries Active | Sweden: Caries Free |
| <i>Streptococcus</i> sp. HOT074                                                           | 1.10                               |                       |                     |
| <i>Streptococcus</i> sp. HOT431                                                           | 1.49                               |                       |                     |
| Species associated with the Romanian high caries and Swedish caries-active groups         |                                    |                       |                     |
| <i>Dialister pneumosintes</i>                                                             | 1.22                               | 1.22                  |                     |
| <i>Gemella haemolysans</i>                                                                | 1.00                               | 1.00                  |                     |
| <i>Leptotrichia shahii</i>                                                                | 1.68                               | 1.68                  |                     |
| <i>Peptostreptococcaceae</i> [I I][G-2] sp. HOT091                                        | 1.07                               | 1.07                  |                     |
| <i>Porphyromonas catoniae</i>                                                             | 1.26                               | 1.26                  |                     |
| <i>Prevotella</i> sp. HOT301                                                              | 1.12                               | 1.12                  |                     |
| <i>Streptococcus mitis</i>                                                                | 1.00                               | 1.00                  |                     |
| <i>Streptococcus</i> sp. HOT070                                                           | 1.09                               | 1.09                  |                     |
| Sweet snacks and species associated with the Swedish caries-active and caries-free groups |                                    |                       |                     |
| Chocolate                                                                                 |                                    | 2.50                  | 2.50                |
| Sweets                                                                                    |                                    | 2.21                  | 2.21                |
| Ice cream                                                                                 |                                    | 2.05                  | 2.05                |
| <i>Actinomyces</i> sp. HOT525                                                             |                                    | 1.01                  | 1.01                |
| <i>Capnocytophaga</i> sp. HOT336                                                          |                                    | 1.13                  | 1.13                |
| <i>Fusobacterium nucleatum</i> subsp. <i>animalis</i>                                     |                                    | 1.14                  | 1.14                |
| <i>Prevotella maculosa</i>                                                                |                                    | 1.10                  | 1.10                |
| <i>Prevotella nigrescens</i>                                                              |                                    | 1.31                  | 1.31                |
| Species associated with the Swedish caries-active group                                   |                                    |                       |                     |
| <i>Actinobaculum</i> sp. HOT183                                                           |                                    | 1.19                  |                     |
| <i>Actinomyces</i> sp. HOT175                                                             |                                    | 1.26                  |                     |
| <i>Actinomyces</i> sp. HOT446                                                             |                                    | 1.21                  |                     |
| <i>Actinomyces</i> sp. HOT448                                                             |                                    | 1.79                  |                     |
| <i>Actinomyces</i> sp. HOT877                                                             |                                    | 1.38                  |                     |
| <i>Alloprevotella tanneriae</i>                                                           |                                    | 1.90                  |                     |
| <i>Bacteroidales</i> [G-2] sp. HOT274                                                     |                                    | 1.11                  |                     |
| <i>Bergeyella</i> sp. HOT907                                                              |                                    | 1.21                  |                     |
| <i>Capnocytophaga</i> sp. HOT324                                                          |                                    | 1.60                  |                     |
| <i>Capnocytophaga</i> sp. HOT326                                                          |                                    | 1.00                  |                     |
| <i>Capnocytophaga</i> sp. HOT864                                                          |                                    | 1.26                  |                     |
| <i>Eubacterium</i> [I I][G-1] <i>infirmum</i>                                             |                                    | 1.23                  |                     |
| <i>F. nucleatum</i> subsp. <i>polymorphum</i>                                             |                                    | 1.02                  |                     |
| <i>F. nucleatum</i> subsp. <i>vincentii</i>                                               |                                    | 1.27                  |                     |
| <i>Gemella bergeri</i>                                                                    |                                    | 1.41                  |                     |
| <i>Kingella oralis</i>                                                                    |                                    | 1.02                  |                     |
| <i>Lachnoanaerobaculum saburreum</i>                                                      |                                    | 1.08                  |                     |
| <i>Leptotrichia buccalis</i>                                                              |                                    | 1.80                  |                     |
| <i>Mitsuokella</i> sp. HOT521                                                             |                                    | 1.18                  |                     |
| <i>Parvimonas</i> sp. HOT110                                                              |                                    | 1.19                  |                     |
| <i>Prevotella enoeca</i>                                                                  |                                    | 1.01                  |                     |
| <i>Prevotella marshii</i>                                                                 |                                    | 1.37                  |                     |
| <i>Prevotella oralis</i>                                                                  |                                    | 1.18                  |                     |
| <i>Prevotella pleuritidis</i>                                                             |                                    | 1.12                  |                     |
| <i>Prevotella</i> sp. HOT293                                                              |                                    | 1.66                  |                     |
| <i>Selenomonas infelix</i>                                                                |                                    | 1.29                  |                     |
| <i>Selenomonas</i> sp. HOT138                                                             |                                    | 1.72                  |                     |
| <i>Selenomonas</i> sp. HOT892                                                             |                                    | 1.45                  |                     |
| <i>Streptococcus constellatus</i>                                                         |                                    | 1.09                  |                     |
| TM7 [G-1] sp. HOT348                                                                      |                                    | 1.07                  |                     |
| TM7 [G-1] sp. HOT349                                                                      |                                    | 1.24                  |                     |
| <i>Treponema socranskii</i>                                                               |                                    | 1.03                  |                     |
| <i>Veillonella parvula</i>                                                                |                                    | 1.05                  |                     |
| Species associated with the Swedish caries-free group                                     |                                    |                       |                     |
| <i>Actinomyces johnsonii</i>                                                              |                                    |                       | 1.12                |
| <i>Actinomyces massiliensis</i>                                                           |                                    |                       | 1.32                |
| <i>Actinomyces naeslundii</i>                                                             |                                    |                       | 1.26                |
| <i>Actinomyces oris</i>                                                                   |                                    |                       | 1.10                |

(continued)

Appendix Table 4. (continued)

|                                                                                 | VIP Value                          |                                              |
|---------------------------------------------------------------------------------|------------------------------------|----------------------------------------------|
|                                                                                 | Romania: High Prevalence of Caries | Sweden: Caries Active<br>Sweden: Caries Free |
| <i>Actinomyces</i> sp. HOT171                                                   |                                    | 1.48                                         |
| <i>Actinomyces</i> sp. HOT177                                                   |                                    | 1.95                                         |
| <i>Actinomyces</i> sp. HOT180                                                   |                                    | 1.46                                         |
| <i>Actinomyces</i> sp. HOT449                                                   |                                    | 1.12                                         |
| <i>Campylobacter gracilis</i>                                                   |                                    | 1.82                                         |
| <i>Capnocytophaga</i> sp. HOT335                                                |                                    | 1.64                                         |
| <i>Clostridiales</i> [F-2][G-1] sp. HOT075                                      |                                    | 1.12                                         |
| <i>Dialister invisus</i>                                                        |                                    | 1.04                                         |
| <i>F. nucleatum</i> subsp. <i>nucleatum</i>                                     |                                    | 1.15                                         |
| <i>Leptotrichia</i> sp. HOT215                                                  |                                    | 1.15                                         |
| <i>Mycoplasma faucium</i>                                                       |                                    | 1.01                                         |
| <i>Mycoplasma salivarium</i>                                                    |                                    | 1.23                                         |
| <i>Prevotella denticola</i>                                                     |                                    | 1.15                                         |
| <i>Prevotella fusca</i>                                                         |                                    | 1.12                                         |
| <i>Prevotella histicola</i>                                                     |                                    | 1.37                                         |
| <i>Prevotella</i> sp. HOT300                                                    |                                    | 1.00                                         |
| <i>Prevotella</i> sp. HOT309                                                    |                                    | 1.10                                         |
| <i>Selenomonas noxia</i>                                                        |                                    | 1.57                                         |
| <i>Selenomonas</i> sp. HOT137                                                   |                                    | 1.46                                         |
| <i>Selenomonas</i> sp. HOT140                                                   |                                    | 1.03                                         |
| <i>Streptococcus pneumoniae</i>                                                 |                                    | 1.02                                         |
| <i>Streptococcus</i> sp. HOT071                                                 |                                    | 1.14                                         |
| Species associated with the Romanian high caries and Swedish caries-free groups |                                    |                                              |
| <i>Atopobium parvulum</i>                                                       | 1.28                               | 1.28                                         |
| <i>Lachnospiraceae</i> [G-2] sp. HOT088                                         | 1.14                               | 1.14                                         |
| <i>Leptotrichia</i> sp. HOT879                                                  | 1.01                               | 1.01                                         |
| <i>Neisseria elongata</i>                                                       | 1.20                               | 1.20                                         |
| <i>Porphyromonas</i> sp. HOT279                                                 | 1.49                               | 1.49                                         |
| <i>Streptococcus mitis</i> bv2                                                  | 1.24                               | 1.24                                         |

Variable Importance in Projection (VIP) values for *S. mutans* by polymerase chain reaction (PCR), *S. sobrinus* by PCR and quantitative PCR (qPCR), 108 species/phylotypes, and sweet snacks that were either highly influential (VIP > 1.5) or influential (VIP > 1.0) in the partial least squares projection. For the remaining 187 species/phylotypes and *S. mutans* by qPCR, the VIP values were <1.0. For variables associated with 2 groups, the VIP value is presented in both columns, and VIP > 1.5 is indicated in red.

## Appendix Reference

Chen T, Yu WH, Izard J, Baranova OV, Lakshmanan A, Dewhirst FE. 2010. The Human Oral Microbiome Database: a web accessible resource for investigating oral microbe taxonomic and genomic information. Database (Oxford). 6:baq013.
